# Supplementary material for: Comparison of health confidence in rural, suburban and urban areas in the UK and the USA: a secondary analysis
Source: PubMed Central journal article supplement — BMJ Open. 2013 May 2;3(5):e002640. doi: 10.1136/bmjopen-2013-002640 (PMC3646176; doi:10.1136/bmjopen-2013-002640), 2013-05-02
Supplement: bmjopen-2013-002640.draft_revisions.pdf [file bmjopen-2013-002640.draft_revisions.pdf]

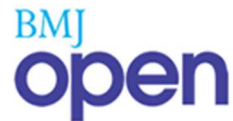

**Comparison of health confidence in rural, suburban, and urban areas in the United Kingdom and the United States: A secondary analysis**

|                                 |                                                                                                                                                                                                                                                                                                                                           |
|---------------------------------|-------------------------------------------------------------------------------------------------------------------------------------------------------------------------------------------------------------------------------------------------------------------------------------------------------------------------------------------|
| Journal:                        | <i>BMJ Open</i>                                                                                                                                                                                                                                                                                                                           |
| Manuscript ID:                  | bmjopen-2013-002640                                                                                                                                                                                                                                                                                                                       |
| Article Type:                   | Research                                                                                                                                                                                                                                                                                                                                  |
| Date Submitted by the Author:   | 25-Jan-2013                                                                                                                                                                                                                                                                                                                               |
| Complete List of Authors:       | Haven, Kristen; University of Arizona, Mel and Enid Zuckerman College of Public Health<br>Celaya, Martín; University of Arizona, Mel and Enid Zuckerman College of Public Health<br>Pierson, Jaclyn; Nyaya Health, Data and Research<br>Weisskopf, Aron; Mercer Human Resource Consulting,<br>MacKinnon, Neil; The University of Arizona, |
| <b>Primary Subject Heading</b>: | Patient-centred medicine                                                                                                                                                                                                                                                                                                                  |
| Secondary Subject Heading:      | Health policy, Health services research, Public health                                                                                                                                                                                                                                                                                    |
| Keywords:                       | Health policy < HEALTH SERVICES ADMINISTRATION & MANAGEMENT, HEALTH SERVICES ADMINISTRATION & MANAGEMENT, Quality in health care < HEALTH SERVICES ADMINISTRATION & MANAGEMENT, Organisation of health services < HEALTH SERVICES ADMINISTRATION & MANAGEMENT, PUBLIC HEALTH                                                              |
|                                 |                                                                                                                                                                                                                                                                                                                                           |

SCHOLARONE™  
Manuscripts

1  
2  
3 **TITLE:** Comparison of health confidence in rural, suburban, and urban areas in the United  
4 Kingdom and the United States: A secondary analysis  
5

6  
7 **SHORT TITLE:** Comparison of health confidence in the United Kingdom and the United States  
8

9 **CORRESPONDING AUTHOR:**

10 Kristen Haven, MA  
11 Mel and Enid Zuckerman College of Public Health  
12 Drachman Hall  
13 The University of Arizona  
14 Tucson, AZ 85721  
15 USA  
16 haven@email.arizona.edu  
17 (520) 834-3402  
18  
19

20  
21 **CO-AUTHORS:**

22 Martín F. Celaya, MPH  
23 Research Specialist  
24 Mel and Enid Zuckerman College of Public Health  
25 The University of Arizona  
26 Tucson, AZ 85721  
27 USA  
28

29  
30 Jaelyn Pierson, MPH, CPH  
31 Director of Data and Research  
32 Nyaya Health  
33 Achham District, Nepal  
34 and 17 West 17th St., 7th Floor  
35 New York, NY 10011  
36 USA  
37

38  
39 Aron J. Weisskopf, MPH  
40 Government Pharmacy Consulting Analyst  
41 Mercer Human Resource Consulting  
42 3131 East Camelback Road  
43 Phoenix, AZ 85016  
44 USA  
45

46  
47  
48 Neil J. MacKinnon, BSc (Pharm), MSc (Pharm), PhD  
49 Professor & The Walter H Pearce Endowed Chair  
50 Director, Center for Rural Health  
51 Mel and Enid Zuckerman College of Public Health  
52 The University of Arizona  
53 Tucson, AZ 85721  
54 USA  
55  
56  
57  
58  
59  
60

**KEYWORDS:**

Confidence  
Health policy  
Healthcare quality  
Patient-centred care  
Patient satisfaction  
Rural  
Urban

**WORD COUNT:** 2,294**ARTICLE SUMMARY**

## 1) Article Focus

- This paper compares consumers' self-reported confidence in health care in the United Kingdom and the United States, using 2010 survey responses gathered by the Commonwealth Fund.
- We sought to determine whether self-reported confidence in healthcare differed between the United Kingdom and the United States, as well as by rurality or urbanicity.

## 2) Key Messages

- We believe that while much current political and academic discourse surrounding healthcare is focused on systems, providers, and policy, patient experience and perception may also be key to understanding and responding to healthcare issues.
- Suburban residents in the US expressed higher confidence in both receiving effective treatment and affording care than their rural and urban counterparts; however, overall confidence in the US was significantly lower than in the UK, where residence type did not have an effect.
- These findings warrant examination of the causes for relative confidence levels in both regions, as well as among residence types within the US. Suburban healthcare in the US should be further examined to identify why it is associated with higher patient confidence levels.

## 3) Strengths and Limitations

*Strengths:*

- Confidence can serve as a useful proxy for understanding patient attitudes and behaviors and has implications distinct from other more commonly discussed notions such as satisfaction or trust, in that confidence implies components of self-efficacy.
- This analysis contributes to an ongoing discourse about healthcare systems by calling attention to the role of patient perspectives in this conversation. Such data provide a potential gauge of public response to policies affecting healthcare.

*Limitations:*

- Confidence is a subjective concept, and interpretations of the concept of confidence in one group may not be generalizable to another for semantic, cultural, and situational reasons.
- Similarly, the definition of "rurality" is not fixed, especially when comparing rural areas across different countries.

**ABSTRACT:**

**Objective:** Confidence in healthcare may influence patients' utilization of healthcare resources and perceptions of healthcare quality. We sought to determine whether self-reported confidence in healthcare differed between the United Kingdom and the United States, as well as by rurality or urbanicity.

**Design:** A secondary analysis of a subset of survey questions regarding self-reported confidence in healthcare from the 2010 Commonwealth Fund International Health Policy Survey.

**Setting:** Telephone survey in the United Kingdom and the United States.

**Participants:** Our final analysis included 1,511 UK residents (688 rural, 446 suburban, 372 urban) and 2,501 US residents (536 rural, 1,294 suburban, 671 urban).

**Outcome measures:** Questions assessed respondents' confidence in the effectiveness and affordability of treatment. We compared survey outcomes from these questions between, and within, the two regions and among, and within, residence types (rural, suburban, and urban).

**Results:** Significant differences were found in self-reported confidence in healthcare between the UK and US, among residence types, and between the two regions within residence types. Reported levels were higher in the UK. Within regions, significant differences by residence type were found for the US but not the UK. Within the US, suburban respondents had the highest self-reported confidence in healthcare.

**Conclusions:** Significant differences exist between the UK and US in confidence in healthcare. In the US but not in the UK, self-reported confidence is related to residence type. Within countries, significant differences by residence type were found for the US but not the UK. Our findings warrant examination of causes for relative confidence levels between regions and among US residence types.

## INTRODUCTION:

A focus on patient-centered care has emerged in recent years in discussions of health care delivery, systems of care, and direct care settings.[1] Patient-centered care is typically defined as care that is responsive to individual patient needs and which facilitates shared decision making among patients, family members, and providers.[2] The patient experience is highly subjective and hinges on emotional, circumstantial, and interpretive factors that are difficult to quantify and compare across groups. While patient satisfaction has been discussed at some length, another subjective measure, the concept of patient confidence, is one that has been understudied thus far.[3] For the purposes this paper, we define confidence in healthcare as a person's reliance on and trust in themselves and in their health system in yielding favorable health outcomes.

Discussions about healthcare dominate the current political and popular discourse. While the focus often centers around fiscal, cultural, and ethical concerns,[4, 5] the tendency to criticize or praise a healthcare system may also be linked to biases, generalizations, and narratives based on personal experiences and beliefs. Confidence in a health system could play a key role in shaping patients' utilization, assessments, and stated desires regarding their health. Nationalized healthcare in the United Kingdom is often held up as a counterpoint to the multi-payer system in the United States;[6] thus a comparison of patient confidence in these two regions could be helpful in better assessing the role of confidence in discussions and decisions pertaining to healthcare.

The UK has been found to have one of the highest levels of patient satisfaction among European countries,[7] and comparisons of health outcomes in the UK and US have explored physical and mental domains of health-related quality of life in the two regions.[6] US-based confidence surveys have explored perceptions and comprehension of health reform[8] and consumer confidence within the US.[9] Building on this research and on public interest in co-examining the UK and US systems, we see value in comparing the two regions on the subjective measure of confidence.

Confidence levels from a patient's perspective may influence both positive and negative health outcomes. Some factors related to confidence include patient satisfaction, medical skepticism, trust in government, health literacy, and management and organization of the healthcare system.[10-13] The efficiency and effectiveness of a healthcare system from a patient's perspective might affect a patient's adherence to medical therapies, self-efficacy, and determination to improve personal health.[14] In the case of medical skepticism, mistrust in the healthcare system could result in a patient's complete denial of any sort of service, believing that she or he is capable of taking care of their own health with no assistance.[10] Personal characteristics that have been found to influence health confidence are health/disease status, age, insurance coverage/ability to pay, the present health service infrastructure, language/cultural barriers, ethnicity, sex/gender, employment status, and socioeconomic position.[15] All of these factors may affect a health system's delivery of programs and services if the community they work with does not feel confident in the system's ability to address issues specific to their community. Nonetheless, confidence and its effects on health continue to be understudied.

We sought to determine whether self-reported confidence in healthcare differed between the United Kingdom and the United States, as well as by rurality or urbanicity.

## METHODS:

Between March and June of 2010, the Commonwealth Fund's International Health Policy Survey was conducted via telephone surveys in 11 countries and from which we used data from the United Kingdom and the United States.[16] The survey contained questions about health and health care experiences, perceptions, coverage, and costs. Households in both the UK and the US were selected using random digit dialing, and both samples were drawn to be representative of the geographic population distribution in each country or region.[16] Alaska and Hawaii were excluded from the US survey. Collection methods are further described elsewhere.[16]

For this analysis, residence categorization data from the UK was recoded from four categories into three categories for side-by-side comparison with the US. American respondents were categorized as living in either a rural, suburban, or urban area. UK respondents were originally categorized as living in a village/rural area, a small town, a large town or suburb of a city, or an urban area. Village/rural area and small town were combined into one "rural" group.

Three questions in the survey sought to assess participants' confidence levels. These questions were: 1. "How confident are you that if you become seriously ill, you will receive the most effective treatment, including drugs and diagnostic tests?" 2. "How confident are you that if you become seriously ill, you will be able to afford the care you need?" and 3. How confident are you that you can control and manage your health problems?" Responses to all three questions were measured on a six-item Likert scale with the items "very confident," "confident," "not very confident," "not at all confident," "unsure," and "decline to answer."

Pearson's chi-square tests were used to compare relative frequencies between and within regions and between and within residence types. To compare data ordinally, rank sum tests were also conducted. Mann-Whitney U tests measured differences between the UK and US overall, as well as between the UK and US within each residence type. Kruskal-Wallis tests were used for rank-sum comparisons between residence types overall and between residence types within each region or country. Significance was set at  $p \leq 0.05$ . All statistical analyses were conducted using Stata, Version 12 (StataCorp. 2011. Stata Statistical Software: Release 12. College Station, TX: StataCorp LP).

## RESULTS:

### Participants:

One thousand, five hundred and eleven (1,511) UK residents and 2,501 US residents responded to the survey. The UK response rate was 24%, and the US response rate was 26%.[16] Eighty-seven percent (86.8%) of UK and 77.0% of US respondents identified as white. Women made up 48.4% of the UK sample and 61.7% of the US respondents. Forty-six percent (45.5%) of UK respondents lived in rural areas or small towns. Only 21.4% of US respondents identified their residence as rural, while over half (51.7%) lived in suburban areas. Demographics are described further in Table 1. Data was missing for five UK respondents on residence type, so these five participants were excluded from the data analysis.

Table 1. Demographic Characteristics, by Region/Country of Residence and Residence Type

---

| Region/Country of Residence                                                                           | United Kingdom          |          |       | United States |          |       |
|-------------------------------------------------------------------------------------------------------|-------------------------|----------|-------|---------------|----------|-------|
|                                                                                                       | n=1511                  |          |       | n=2501        |          |       |
| Residence Type <sup>a</sup>                                                                           | Rural/<br>Small<br>Town | Suburban | Urban | Rural         | Suburban | Urban |
|                                                                                                       | 688                     | 446      | 372   | 536           | 1294     | 671   |
| Age                                                                                                   |                         |          |       |               |          |       |
| 18-29                                                                                                 | 215                     | 118      | 117   | 32            | 73       | 63    |
| 30-49                                                                                                 | 235                     | 185      | 162   | 149           | 370      | 209   |
| 50-64                                                                                                 | 131                     | 93       | 51    | 171           | 431      | 192   |
| 65+                                                                                                   | 107                     | 50       | 42    | 184           | 420      | 207   |
| Gender                                                                                                |                         |          |       |               |          |       |
| Male                                                                                                  | 358                     | 229      | 188   | 201           | 516      | 240   |
| Female                                                                                                | 330                     | 217      | 184   | 335           | 778      | 431   |
| Income Level <sup>b</sup>                                                                             |                         |          |       |               |          |       |
| Much below average                                                                                    | 26                      | 6        | 17    | 106           | 196      | 130   |
| Somewhat below average                                                                                | 109                     | 70       | 46    | 112           | 203      | 114   |
| Average                                                                                               | 345                     | 234      | 171   | 139           | 262      | 154   |
| Somewhat above average                                                                                | 95                      | 111      | 99    | 101           | 339      | 131   |
| Much above average                                                                                    | 12                      | 6        | 18    | 33            | 165      | 84    |
| Race/Ethnicity                                                                                        |                         |          |       |               |          |       |
| White, Non-Hispanic                                                                                   |                         |          |       | 450           | 1031     | 445   |
| Black, Non-Hispanic                                                                                   |                         |          |       | 33            | 59       | 83    |
| Hispanic                                                                                              |                         |          |       | 26            | 96       | 73    |
| White (British, Irish, Other<br>European)                                                             | 610                     | 388      | 314   |               |          |       |
| Mixed (White and Black Caribbean,<br>White and Black African, White<br>and<br>Asian, Any Other Mixed) | 54                      | 36       | 31    |               |          |       |
| Asian or Asian British                                                                                | 10                      | 8        | 14    |               |          |       |
| Black or Black British                                                                                | 8                       | 14       | 9     |               |          |       |
| Chinese                                                                                               | 1                       | 0        | 3     |               |          |       |
| Other                                                                                                 | 2                       | 0        | 1     |               |          |       |
| Decline to answer                                                                                     | 3                       | 0        | 0     |               |          |       |

<sup>a</sup>Missing data from 5 UK respondents on Residence Type

<sup>b</sup>Missing data from 141 UK and 232 US respondents on Income Level

### Outcomes:

A limited sample of respondents from each country (n=471 UK and 1,486 US) answered the question “How confident are you that you can control and manage your health problems?” Over 90% of this limited pool of respondents in both regions answered “very confident” or “confident,” so a statistical comparison was not meaningful, and that question was removed from the final analysis. Results of the other two confidence questions, “How confident are you that if you become seriously ill, you will receive the most effective treatment, including drugs and

diagnostic tests?” and “How confident are you that if you become seriously ill, you will be able to afford the care you need?” are described as follows.

Confidence in receiving effective treatment:

Overall, the differences between the UK and the US for responses on confidence in receiving effective treatment were significant for both chi-square and Mann-Whitney U tests (Table 2).

Table 2. Survey responses to the question:

How confident are you that if you become seriously ill, you will receive the most effective treatment, including drugs and diagnostic tests?

|                                                                   | Confidence Level (%) |           |                    |                      |          |                   | $\chi^2$ | Mann-Whitney U | Kruskal-Wallis |
|-------------------------------------------------------------------|----------------------|-----------|--------------------|----------------------|----------|-------------------|----------|----------------|----------------|
|                                                                   | Very confident       | Confident | Not very confident | Not at all confident | Not sure | Decline to answer |          |                |                |
| Comparison between Region/Country <sup>a</sup>                    |                      |           |                    |                      |          |                   | p<0.001* | p<0.001*       |                |
| United Kingdom                                                    | 32.0%                | 61.3%     | 5.6%               | 0.7%                 | 0.4%     | 0.0%              |          |                |                |
| United States                                                     | 34.6%                | 38.7%     | 16.0%              | 9.1%                 | 1.3%     | 0.3%              |          |                |                |
| Comparison between Residence Types <sup>b</sup>                   |                      |           |                    |                      |          |                   | p=0.004* |                | p=0.004*       |
| Rural                                                             | 32.0%                | 51.2%     | 10.2%              | 5.2%                 | 1.2%     | 0.1%              |          |                |                |
| Suburban                                                          | 35.9%                | 44.9%     | 12.4%              | 5.6%                 | 1.0%     | 0.2%              |          |                |                |
| Urban                                                             | 31.7%                | 46.3%     | 13.8%              | 7.2%                 | 0.6%     | 0.4%              |          |                |                |
| Comparison within Residence Types, by Region/Country <sup>c</sup> |                      |           |                    |                      |          |                   |          |                |                |
| Rural                                                             |                      |           |                    |                      |          |                   | p<0.001* | p<0.001*       |                |
| Suburban                                                          |                      |           |                    |                      |          |                   | p<0.001* | p=0.009*       |                |
| Urban                                                             |                      |           |                    |                      |          |                   | p<0.001* | p<0.001*       |                |
| Comparison within Region/Country, by Residence Types <sup>d</sup> |                      |           |                    |                      |          |                   |          |                |                |
| United Kingdom                                                    |                      |           |                    |                      |          |                   | p=0.817  |                | p=0.781        |
| United States                                                     |                      |           |                    |                      |          |                   | p=0.003* |                | p=0.001*       |

<sup>a,c</sup>Chi-square and Mann-Whitney U tests

<sup>b,d</sup>Chi-square and Kruskal-Wallis tests

Ninety-three percent (93.3%) of UK residents were confident or very confident in receiving effective treatment, compared with 73.3% of US residents. Within residence types, Mann-Whitney and chi-square tests revealed statistically significant differences between countries (all p<0.01). Among residence types overall, differences were also significant based on both chi-square and Kruskal-Wallis tests. Within each country, there were only statistically significant differences by residence type in the US ( $\chi^2$  p=0.003, Kruskal-Wallis p=0.001) and not in the UK ( $\chi^2$  p=0.817, Kruskal-Wallis p=0.781).

Confidence in affording care:

Statistically significant differences were found between the UK and US via chi-square and Mann-Whitney tests (Table 3).

Table 3. Survey responses to the question:

How confident are you that if you become seriously ill, you will be able to afford the care you need?

Confidence Level (%)



|                                                                   | Very confident | Confident | Not very confident | Not at all confident | Not sure | Decline to answer | $\chi^2$ | Mann-Whitney U | Kruskal-Wallis |
|-------------------------------------------------------------------|----------------|-----------|--------------------|----------------------|----------|-------------------|----------|----------------|----------------|
| Comparison between Region/Country <sup>a</sup>                    |                |           |                    |                      |          |                   | p<0.001* | p<0.001*       |                |
| United Kingdom                                                    | 33.8%          | 57.2%     | 6.6%               | 0.6%                 | 1.9%     | 0.0%              |          |                |                |
| United States                                                     | 26.6%          | 35.0%     | 22.4%              | 13.6%                | 2.1%     | 0.3%              |          |                |                |
| Comparison between Residence Types <sup>b</sup>                   |                |           |                    |                      |          |                   | p=0.002* |                | p=0.388        |
| Rural                                                             | 27.5%          | 47.7%     | 15.4%              | 6.8%                 | 2.5%     | 0.1%              |          |                |                |
| Suburban                                                          | 30.7%          | 41.5%     | 17.1%              | 8.7%                 | 1.7%     | 0.3%              |          |                |                |
| Urban                                                             | 29.1%          | 41.4%     | 16.6%              | 11.0%                | 1.8%     | 0.1%              |          |                |                |
| Comparison within Residence Types, by Region/Country <sup>c</sup> |                |           |                    |                      |          |                   |          |                |                |
| Rural                                                             |                |           |                    |                      |          |                   | p<0.001* | p<0.001*       |                |
| Suburban                                                          |                |           |                    |                      |          |                   | p<0.001* | p<0.001*       |                |
| Urban                                                             |                |           |                    |                      |          |                   | p<0.001* | p<0.001*       |                |
| Comparison within Region/Country, by Residence Types <sup>d</sup> |                |           |                    |                      |          |                   |          |                |                |
| United Kingdom                                                    |                |           |                    |                      |          |                   | p=0.339  |                | p=0.084        |
| United States                                                     |                |           |                    |                      |          |                   | p=0.001* |                | p=0.001*       |

<sup>a,c</sup>Chi-square and Mann-Whitney U tests

<sup>b,d</sup>Chi-square and Kruskal-Wallis tests

In the UK, 91% of respondents were confident or very confident in their ability to afford healthcare, versus 61.6% in the US. Within residence types there were also statistically significant differences. Among residence types overall, there were only statistically significant differences based the chi-square test, not on the Kruskal-Wallis. Within the UK and US, as for the effective treatment question, differences in confidence based on residence type were only statistically significant for US respondents (US:  $\chi^2$  p=0.001, Kruskal-Wallis p=0.001; UK  $\chi^2$  p=0.339, Kruskal-Wallis p=0.084).

A descriptive analysis of responses by residence type in the US revealed that suburban respondents had the highest percentage (76.3%) of confident or very confident ratings in effectiveness of treatment, versus 69.4% in rural areas and 70.4% in urban areas. Regarding ability to afford treatment in the US, 65.4% of suburban residents were confident or very confident, compared with 56.8% in rural areas and 58.2% in urban areas.

## DISCUSSION:

Significant differences were found between the UK and the US in health confidence. Suburban residents in the US expressed higher confidence in both receiving effective treatment and affording care than their rural and urban counterparts; however, overall confidence in the US was significantly lower than in the UK, where residence type did not have an effect. The effect of the overall difference between residence types may be moderated by the lack of difference in the UK. Our findings are supported by a previous study which found that in the UK the public is happier than in the US (and other countries surveyed) regarding their healthcare system and are least likely to be worried about future health care needs.[17]

These findings warrant examination of the causes for relative confidence levels in both regions,

1  
2  
3 as well as among residence types within the US. Specifically, the larger percentage of suburban  
4 Americans who rated their confidence as high implies that factors in the suburban environment  
5 may contribute to a sense of control or reliability. While disparities in access, safety, and quality  
6 of care between rural and urban areas are well-documented,[18, 19] our findings suggest that  
7 exploring the suburban healthcare environment could provide insight into US healthcare  
8 attitudes, especially given that 50% of Americans live in suburban areas.[20]  
9  
10

11 This analysis contributes to an ongoing discourse about healthcare systems by calling attention to  
12 the role of patient perspectives in this conversation. How end users perceive their system to be  
13 serving them or accessible to them is an important factor in assessing, maintaining, and revising  
14 healthcare legislation, pricing, standards of care, and communication frameworks. Data on  
15 confidence, particularly in patient assessments of future or hypothetical health circumstances,  
16 provide insight into how patients might make decisions in planning and paying for health care.  
17 Such data also provide a potential gauge of public response to policies affecting healthcare. Our  
18 findings that UK residents have greater self-reported confidence in healthcare might suggest  
19 higher levels of trust and perceived system stability as well as a perspective of confidence as a  
20 social norm. The outcomes determined here may be viewed not only as markers of patients'  
21 personal experiences with health care, but also as indicators of the sociocultural context in which  
22 each healthcare system functions.  
23  
24  
25  
26

27 We acknowledge the inability to assess wholly the concept of confidence. Confidence in one  
28 group may not be generalizable to another for semantic, cultural, and situational reasons.  
29 However, confidence can serve as a useful proxy for understanding patient attitudes and  
30 behaviors and has implications distinct from other more commonly discussed notions such as  
31 satisfaction or trust, in that confidence implies components of self-efficacy. For both populations  
32 sampled in this study, data was gathered from English-speaking respondents who answered  
33 survey questions about confidence written in English, and both groups received the questions  
34 worded identically, providing some consistency in how confidence might be interpreted here  
35 across groups.  
36  
37  
38

39 There remain a number of constraints and limitations on our data and subsequent conclusions  
40 which must be taken into consideration. The issue of confidence itself is somewhat troublesome  
41 given its inherently subjective nature and the myriad factors that can contribute to individual  
42 confidence. Age, gender, ethnicity, education, socioeconomic status, health status, and health  
43 literacy are just a few of the many factors that can potentially contribute to confidence in  
44 healthcare, and each might also serve as a potential confounder. Notably, two of the three  
45 Commonwealth Fund questions involve notions of personal forecasting (“if I become seriously  
46 ill, then...”), which may be more subject to biases than questions about conditions that are  
47 already present.  
48  
49

50 Furthermore, the definition of “rurality” can be problematic, especially given the disparate  
51 categories for the UK and US. Although the recoding of these categories to combine “village/  
52 rural area” and “small town” in the UK was rather simple, definitions of what constitutes rural,  
53 suburban, and other descriptors varies culturally and contextually. It is also notable that four  
54 healthcare systems are actually included in the Commonwealth Fund’s category for the UK.  
55 Scotland, Wales, Northern Ireland, and England each maintain unique healthcare systems, and  
56  
57  
58  
59  
60

1  
2  
3 despite their similarities, this must be noted when assigning value to UK health system efficacy  
4 in comparison to the US.  
5  
6

7 **CONCLUSION:**

8 Our analyses revealed significant differences between the UK and the US in self-reported  
9 confidence levels, suggesting a disparity between these regions and their systems in the provision  
10 of equitable healthcare to all residents. Suburban healthcare in the US should be further  
11 examined to identify why it is associated with higher patient confidence levels. The findings of  
12 this study build on existing literature and may provide insight for policy developers and health  
13 practitioners working with rural, suburban, and urban communities. Patient confidence would be  
14 an interesting and culturally relevant measure for future survey projects to explore in more detail.  
15  
16

17 **ACKNOWLEDGEMENTS:**

18 The authors wish to thank Cathy Schoen, Michelle Doty, Robin Osborn, David Squires, and  
19 Kristof Stremikis from the Commonwealth Fund for providing the data set and input on the final  
20 draft of this manuscript.  
21  
22

23 **COMPETING INTERESTS:** None to declare.  
24

25 **FUNDING:** None of the authors have an actual or potential financial or commercial conflict of  
26 interest with the information presented in this manuscript.  
27  
28

29 **DATA SHARING:** There is no additional data available.  
30  
31  
32  
33  
34  
35  
36  
37  
38  
39  
40  
41  
42  
43  
44  
45  
46  
47  
48  
49  
50  
51  
52  
53  
54  
55  
56  
57  
58  
59  
60

## REFERENCES

- 1  
2  
3  
4  
5  
6  
7  
8  
9  
10  
11  
12  
13  
14  
15  
16  
17  
18  
19  
20  
21  
22  
23  
24  
25  
26  
27  
28  
29  
30  
31  
32  
33  
34  
35  
36  
37  
38  
39  
40  
41  
42  
43  
44  
45  
46  
47  
48  
49  
50  
51  
52  
53  
54  
55  
56  
57  
58  
59  
60
- 1 Snyder CF, Aaronson NK, Choucair AK, et al. Implementing patient-reported outcomes assessment in clinical practice: a review of the options and considerations. *Qual Life Res* 2012; **21**(8):1305-14.
  - 2 Rathert C, Wyrwich MD, Boren SA. Patient-centered care and outcomes: a systematic review of the literature. *Med Care Res Rev* Published Online First: 20 November 2012. doi:10.1177/1077558712465774.
  - 3 Aiken LH, Sermeus W, Van den Heede K, et al. Patient safety, satisfaction, and quality of hospital care: cross sectional surveys of nurses and patients in 12 countries in Europe and the United States. *BMJ* 2012;Mar 20(344:e1717) doi:10.1136/bmj.e1717.
  - 4 Campbell AL. Down the Insurance Rabbit Hole - NYTimes.com. The New York Times. 2012-04-04. Accessed January 9, 2013 from <http://www.nytimes.com/2012/04/05/opinion/down-the-insurance-rabbit-hole.html>.
  - 5 Adam K. Health-Reform Rhetoric Gets Personal for Britons. The Washington Post. 2009-08-13. Accessed January 9, 2013 from <http://www.washingtonpost.com/wp-dyn/content/article/2009/08/12/AR2009081202955.html>.
  - 6 Franco OH, Wong YL, Kandala NB, et al. Cross-cultural comparison of correlates of quality of life and health status: the Whitehall II Study (UK) and the Western New York Health Study (US). *Eur J Epidemiol* 2012;**27**(4):255-65.
  - 7 Coulter A, Jenkinson C. European patients' views on the responsiveness of health systems and healthcare providers. *Eur J Public Health* 2005;**15**(4):355-60.
  - 8 Employee Benefit Research Institute. Health Confidence Survey: Most Americans Unfamiliar With Key Aspects of Health Reform. *EBRI Notes* 2011;**32**(9):1-22.
  - 9 Robert Wood Johnson Foundation. RWJF Health Care Consumer Confidence Index: July 2009; Accessed January 9, 2013 from <http://www.rwjf.org/healthpolicy/product.jsp?id=47328>.
  - 10 Rohrer JE, Borders TF. Healthy skepticism. *Adv Prev Med* 2004;**39**(6):1234-7.
  - 11 Calnan MW, Sanford E. Public trust in health care: the system or the doctor? *Qual Saf Health Care* 2004;**13**(2):92-7.

1  
2  
3 12 Hesse BW, Nelson DE, Kreps GL, et al. Trust and sources of health information: the impact  
4 of the Internet and its implications for health care providers: findings from the first Health  
5 Information National Trends Survey. *Arch Intern Med* 2005;**165**(22):2618.  
6  
7

8  
9 13 Rockers PC, Kruk ME, Laugesen MJ. Perceptions of the health system and public trust in  
10 government in low-and middle-income countries: evidence from the World Health Surveys. *J*  
11 *Health Polit Policy Law* 2012;**37**(3):405-37.  
12  
13

14 14 Delamater AM. Improving patient adherence. *Clin Diabetes* 2006;**24**(2):71-7.  
15  
16

17  
18 15 Borders TF, Lensing S, Xu KT. Health confidence and racial and ethnic disparities in  
19 consumers' assessments of health care. *Am J Med Qual* 2011;**26**(3):220-8.  
20  
21

22 16 Schoen C, Osborn R, Squires D, et al. How health insurance design affects access to care and  
23 costs, by income, in eleven countries. *Health Aff* 2010;**29**(12):2323-34.  
24  
25

26  
27 17 Donelan K, Blendon RJ, Schoen C, et al. The cost of health system change: public discontent  
28 in five nations. *Health Aff* 1999;**18**(3):206-16.  
29  
30

31 18 Ryan K, Rahman A. Examining factors influencing patient satisfaction with nurse  
32 practitioners in rural urgent care centers. *J Am Acad Nurse Pract* 2012;**24**(2):77-81.  
33  
34

35  
36 19 Bennett K, Olatosi B, Probst J. Health Disparities: A Rural-Urban Chartbook. Carolina Rural  
37 Health Research Center, 2008; Accessed January 9, 2013 from  
38 [http://rhr.sph.sc.edu/report\\_by\\_topic.html#1-09](http://rhr.sph.sc.edu/report_by_topic.html#1-09).  
39  
40

41 20 Hobbs F, Stoops N. Demographic Trends in the 20th Century: Census 2000 Special Reports.  
42 US Census Bureau, 2002; Accessed January 9, 2013 from  
43 <http://www.census.gov/prod/2002pubs/censr-4.pdf>.  
44  
45  
46  
47  
48  
49  
50  
51  
52  
53  
54  
55  
56  
57  
58  
59  
60

1  
2  
3  
4  
5  
6  
7  
8  
9  
10  
11  
12  
13  
14  
15  
16  
17  
18  
19  
20  
21  
22  
23  
24  
25  
26  
27  
28  
29  
30  
31  
32  
33  
34  
35  
36  
37  
38  
39  
40  
41  
42  
43  
44  
45  
46  
47  
48  
49  
50  
51  
52  
53  
54  
55  
56  
57  
58  
59  
60

For peer review only



**Comparison of health confidence in rural, suburban, and urban areas in the United Kingdom and the United States: A secondary analysis**

|                                 |                                                                                                                                                                                                                                                                                                                                           |
|---------------------------------|-------------------------------------------------------------------------------------------------------------------------------------------------------------------------------------------------------------------------------------------------------------------------------------------------------------------------------------------|
| Journal:                        | <i>BMJ Open</i>                                                                                                                                                                                                                                                                                                                           |
| Manuscript ID:                  | bmjopen-2013-002640.R1                                                                                                                                                                                                                                                                                                                    |
| Article Type:                   | Research                                                                                                                                                                                                                                                                                                                                  |
| Date Submitted by the Author:   | 14-Mar-2013                                                                                                                                                                                                                                                                                                                               |
| Complete List of Authors:       | Haven, Kristen; University of Arizona, Mel and Enid Zuckerman College of Public Health<br>Celaya, Martín; University of Arizona, Mel and Enid Zuckerman College of Public Health<br>Pierson, Jaclyn; Nyaya Health, Data and Research<br>Weisskopf, Aron; Mercer Human Resource Consulting,<br>MacKinnon, Neil; The University of Arizona, |
| <b>Primary Subject Heading</b>: | Patient-centred medicine                                                                                                                                                                                                                                                                                                                  |
| Secondary Subject Heading:      | Health policy, Health services research, Public health                                                                                                                                                                                                                                                                                    |
| Keywords:                       | Health policy < HEALTH SERVICES ADMINISTRATION & MANAGEMENT, HEALTH SERVICES ADMINISTRATION & MANAGEMENT, Quality in health care < HEALTH SERVICES ADMINISTRATION & MANAGEMENT, Organisation of health services < HEALTH SERVICES ADMINISTRATION & MANAGEMENT, PUBLIC HEALTH                                                              |
|                                 |                                                                                                                                                                                                                                                                                                                                           |

SCHOLARONE™  
Manuscripts

1  
2  
3 **TITLE:** Comparison of health confidence in rural, suburban, and urban areas in the United  
4 Kingdom and the United States: A secondary analysis  
5

6  
7 **SHORT TITLE:** Comparison of health confidence in the United Kingdom and the United States  
8

9 **CORRESPONDING AUTHOR:**

10 Kristen Haven, MA  
11 Mel and Enid Zuckerman College of Public Health  
12 Drachman Hall  
13 The University of Arizona  
14 Tucson, AZ 85721  
15 USA  
16 haven@email.arizona.edu  
17 (520) 834-3402  
18  
19

20  
21 **CO-AUTHORS:**

22 Martín F. Celaya, MPH  
23 Research Specialist  
24 Mel and Enid Zuckerman College of Public Health  
25 The University of Arizona  
26 Tucson, AZ 85721  
27 USA  
28

29  
30 Jaelyn Pierson, MPH, CPH  
31 Director of Data and Research  
32 Nyaya Health  
33 Achham District, Nepal  
34 and 17 West 17th St., 7th Floor  
35 New York, NY 10011  
36 USA  
37

38  
39 Aron J. Weisskopf, MPH  
40 Government Pharmacy Consulting Analyst  
41 Mercer Human Resource Consulting  
42 3131 East Camelback Road  
43 Phoenix, AZ 85016  
44 USA  
45

46  
47  
48 Neil J. MacKinnon, BSc (Pharm), MSc (Pharm), PhD  
49 Professor & The Walter H Pearce Endowed Chair  
50 Director, Center for Rural Health  
51 Mel and Enid Zuckerman College of Public Health  
52 The University of Arizona  
53 Tucson, AZ 85721  
54 USA  
55  
56  
57  
58  
59  
60



**KEYWORDS:**

Confidence  
Health policy  
Healthcare quality  
Patient-centred care  
Patient satisfaction  
Rural  
Urban

**WORD COUNT:** 2,800**ARTICLE SUMMARY**

## 1) Article Focus

- This paper compares consumers' self-reported confidence in health care in the United Kingdom and the United States, using 2010 survey responses gathered by the Commonwealth Fund.
- We sought to determine whether self-reported confidence in healthcare differed between the United Kingdom and the United States, as well as by rurality or urbanicity.

## 2) Key Messages

- We believe that while much current political and academic discourse surrounding healthcare is focused on systems, providers, and policy, patient experience and perception may also be key to understanding and responding to healthcare issues.
- Suburban residents in the US expressed higher confidence in both receiving effective treatment and affording care than their rural and urban counterparts; however, overall confidence in the US was significantly lower than in the UK, where residence type did not have an effect.
- These findings warrant examination of the causes for relative confidence levels in both regions, as well as among residence types within the US. Suburban healthcare in the US should be further examined to identify why it is associated with higher patient confidence levels.

## 3) Strengths and Limitations

*Strengths:*

- Confidence can serve as a useful proxy for understanding patient attitudes and behaviors and has implications distinct from other more commonly discussed notions such as satisfaction or trust, in that confidence implies components of self-efficacy.
- This analysis contributes to an ongoing discourse about healthcare systems by calling attention to the role of patient perspectives in this conversation. Such data provide a potential gauge of public response to policies affecting healthcare.

*Limitations:*

- Confidence is a subjective concept, and interpretations of the concept of confidence in one group may not be generalizable to another for semantic, cultural, and situational reasons.
- Similarly, the definition of "rurality" is not fixed, especially when comparing rural areas across different countries.

**ABSTRACT:**

**Objective:** Confidence in healthcare may influence patients' utilization of healthcare resources and perceptions of healthcare quality. We sought to determine whether self-reported confidence in healthcare differed between the United Kingdom and the United States, as well as by rurality or urbanicity.

**Design:** A secondary analysis of a subset of survey questions regarding self-reported confidence in healthcare from the 2010 Commonwealth Fund International Health Policy Survey.

**Setting:** Telephone survey of participants from the United Kingdom and the United States.

**Participants:** Our final analysis included 1,511 UK residents (688 rural, 446 suburban, 372 urban) and 2,501 US residents (536 rural, 1,294 suburban, 671 urban).

**Outcome measures:** Questions assessed respondents' confidence in the effectiveness and affordability of treatment. We compared survey outcomes from these questions between, and within, the two regions and among, and within, residence types (rural, suburban, and urban).

**Results:** Significant differences were found in self-reported confidence in healthcare between the UK and US, among residence types, and between the two regions within residence types. Reported levels were higher in the UK. Within regions, significant differences by residence type were found for the US but not the UK. Within the US, suburban respondents had the highest self-reported confidence in healthcare.

**Conclusions:** Significant differences exist between the UK and US in confidence in healthcare. In the US but not in the UK, self-reported confidence is related to residence type. Within countries, significant differences by residence type were found for the US but not the UK. Our findings warrant examination of causes for relative confidence levels between regions and among US residence types.

## INTRODUCTION:

A focus on patient-centered care has emerged in recent years in discussions of health care delivery, systems of care, and direct care settings.[1, 2] Patient-centred care is typically defined as care that is responsive to individual patient needs and which facilitates shared decision making among patients, family members, and providers.[3] The patient experience is highly subjective and hinges on emotional, circumstantial, and interpretive factors that are difficult to quantify and compare across groups.

While patient satisfaction has been discussed at some length [4, 5], another subjective measure, the concept of patient confidence in health care, is one that has been understudied thus far. The question of provider confidence in patients' abilities to care for themselves has been studied, but this research did not look into patients' own confidence regarding their health and health care.[6] A survey conducted in the United States (US) explored the public's confidence in affording and accessing care.[7] Another US survey measured respondents' confidence in their ability to overcome disease without medical assistance.[8]

Related issues like patient satisfaction and self-efficacy have been explored in depth,[4, 5, 9, 10] but these notions are distinct from confidence. Confidence is defined as assurance or reliance on oneself, on other people or on things, or in circumstances.[11] Self-efficacy is related to personal sense of capacity/capability,[12] while satisfaction is a response or impression following an experience.[13] Consumer confidence in health care has been surveyed,[14] but this is a facet of confidence focused more narrowly on consumer spending. For the purposes of this paper, we draw on the dictionary definition[11] and previous health confidence survey questions[7] to define confidence in healthcare as a person's reliance on and trust in themselves and in their health system in yielding favorable health outcomes.

With the passage and implementation of the Patient Protection and Affordable Care Act in the US, discussions about healthcare have dominated recent political and popular discourse.[15, 16] While the focus often centers around fiscal, cultural, and ethical concerns, the tendency to criticize or praise a healthcare system may also be linked to biases, generalizations, and narratives based on personal experiences and beliefs.[17, 18] Confidence in one's individual health care and in the health system may play a key role in shaping patients' utilization, assessments, and stated desires regarding their health. Single-payer, publicly administered healthcare in the United Kingdom (UK) is often held up as a counterpoint to the more fragmented multi-payer, fee-for-service system in the US;[19, 20, 21] thus a comparison of patient confidence in these two regions could be helpful in better assessing the role of confidence in discussions and decisions pertaining to healthcare.

The UK has been found to have one of the highest levels of patient satisfaction among European countries,[22] and comparisons of health outcomes in the UK and US have explored physical and mental domains of health-related quality of life in the two regions.[23] US-based confidence surveys have explored perceptions and comprehension of health reform[7] and consumer confidence within the US.[14] Building on this research and on public interest in co-examining the UK and US systems, we see value in comparing the two regions on the subjective measure of confidence.

1  
2  
3 Some factors related to confidence in healthcare include patient satisfaction, medical skepticism,  
4 trust in government, health literacy, and management and organization of the healthcare  
5 system.[23-26] The efficiency and effectiveness of a healthcare system from a patient's  
6 perspective might affect patient adherence to medical therapies, self-efficacy, and determination  
7 to improve personal health.[27] In the case of medical skepticism, mistrust in the healthcare  
8 system could result in a patient's complete denial of any sort of service, believing that she or he  
9 is capable of taking care of their own health with no assistance.[23] Personal characteristics that  
10 have been found to influence confidence in personal health management are disease status, age,  
11 insurance coverage/ability to pay, the present health service infrastructure, language and cultural  
12 barriers, ethnicity, sex/gender, employment status, and socioeconomic position.[8] These factors  
13 may affect a health system's delivery of programs and services if community members do not  
14 feel confident in the system's ability to address issues specific to their community. Rural, lower  
15 resource communities with poorer system performance have been associated with low patient  
16 satisfaction,[28] and a Canadian study found that place of residence contributed to patient  
17 satisfaction.[29] Factors such as perceived or actual facility or system performance and residence  
18 type may influence patient confidence in healthcare.

19  
20 We sought to determine whether self-reported confidence in healthcare differed between the  
21 United Kingdom and the United States, as well as by rurality or urbanicity.

## 22 23 24 25 26 27 **METHODS:**

28 Between March and June of 2010, the Commonwealth Fund's International Health Policy  
29 Survey was conducted via telephone surveys in 11 countries and from which we used data from  
30 the United Kingdom and the United States.[30] The survey contained questions about health and  
31 health care experiences, perceptions, coverage, and costs. Households in both the UK and the US  
32 were selected using random digit dialing, and both samples were drawn to be representative of  
33 the geographic population distribution in each country or region.[30] Alaska and Hawaii were  
34 excluded from the US survey. Collection methods are further described elsewhere.[30]

35  
36  
37 For this analysis, residence categorization data from the UK was recoded from four categories  
38 into three categories for side-by-side comparison with the US. American respondents were  
39 categorized as living in either a rural, suburban, or urban area. UK respondents were originally  
40 categorized as living in a village/rural area, a small town, a large town or suburb of a city, or an  
41 urban area. Village/rural area and small town were combined into one "rural" group.

42  
43  
44 Three questions in the survey sought to assess participants' confidence levels. These questions  
45 were: 1. "How confident are you that if you become seriously ill, you will receive the most  
46 effective treatment, including drugs and diagnostic tests?" 2. "How confident are you that if you  
47 become seriously ill, you will be able to afford the care you need?" and 3. How confident are you  
48 that you can control and manage your health problems?" Responses to all three questions were  
49 measured on a six-item Likert scale with the items "very confident," "confident," "not very  
50 confident," "not at all confident," "unsure," and "decline to answer."

51  
52  
53  
54 Pearson's chi-square tests were used to compare relative frequencies between and within regions  
55 and between and within residence types. To compare data ordinally, rank sum tests were also  
56 conducted. Mann-Whitney U tests measured differences between the UK and US overall, as well  
57 as between the UK and US within each residence type. Kruskal-Wallis tests were used for rank-

sum comparisons between residence types overall and between residence types within each region or country. Significance was set at  $p \leq 0.05$ . All statistical analyses were conducted using Stata, Version 12 (StataCorp. 2011. Stata Statistical Software: Release 12. College Station, TX: StataCorp LP).

## RESULTS:

### Participants:

One thousand, five hundred and eleven (1,511) UK residents and 2,501 US residents responded to the survey. The UK response rate was 24%, and the US response rate was 26%. [16] Eighty-seven percent (86.8%) of UK and 77.0% of US respondents identified as white. Women made up 48.4% of the UK sample and 61.7% of the US respondents. Forty-six percent (45.5%) of UK respondents lived in rural areas or small towns. Only 21.4% of US respondents identified their residence as rural, while over half (51.7%) lived in suburban areas. Demographics are described further in Table 1. Data was missing for five UK respondents on residence type, so these five participants were excluded from the data analysis.

Table 1. Demographic Characteristics, by Region/Country of Residence and Residence Type

| Region/Country of Residence               | United Kingdom          |          |       | United States |          |       |
|-------------------------------------------|-------------------------|----------|-------|---------------|----------|-------|
|                                           | n=1511                  |          |       | n=2501        |          |       |
| Residence Type <sup>a</sup>               | Rural/<br>Small<br>Town | Suburban | Urban | Rural         | Suburban | Urban |
|                                           | 688                     | 446      | 372   | 536           | 1294     | 671   |
| Age                                       |                         |          |       |               |          |       |
| 18-29                                     | 215                     | 118      | 117   | 32            | 73       | 63    |
| 30-49                                     | 235                     | 185      | 162   | 149           | 370      | 209   |
| 50-64                                     | 131                     | 93       | 51    | 171           | 431      | 192   |
| 65+                                       | 107                     | 50       | 42    | 184           | 420      | 207   |
| Gender                                    |                         |          |       |               |          |       |
| Male                                      | 358                     | 229      | 188   | 201           | 516      | 240   |
| Female                                    | 330                     | 217      | 184   | 335           | 778      | 431   |
| Income Level <sup>b</sup>                 |                         |          |       |               |          |       |
| Much below average                        | 26                      | 6        | 17    | 106           | 196      | 130   |
| Somewhat below average                    | 109                     | 70       | 46    | 112           | 203      | 114   |
| Average                                   | 345                     | 234      | 171   | 139           | 262      | 154   |
| Somewhat above average                    | 95                      | 111      | 99    | 101           | 339      | 131   |
| Much above average                        | 12                      | 6        | 18    | 33            | 165      | 84    |
| Race/Ethnicity                            |                         |          |       |               |          |       |
| White, Non-Hispanic                       |                         |          |       | 450           | 1031     | 445   |
| Black, Non-Hispanic                       |                         |          |       | 33            | 59       | 83    |
| Hispanic                                  |                         |          |       | 26            | 96       | 73    |
| White (British, Irish, Other<br>European) | 610                     | 388      | 314   |               |          |       |

|                                                                                                       |    |    |    |
|-------------------------------------------------------------------------------------------------------|----|----|----|
| Mixed (White and Black Caribbean,<br>White and Black African, White<br>and<br>Asian, Any Other Mixed) | 54 | 36 | 31 |
| Asian or Asian British                                                                                | 10 | 8  | 14 |
| Black or Black British                                                                                | 8  | 14 | 9  |
| Chinese                                                                                               | 1  | 0  | 3  |
| Other                                                                                                 | 2  | 0  | 1  |
| Decline to answer                                                                                     | 3  | 0  | 0  |

<sup>a</sup>Missing data from 5 UK respondents on Residence Type

<sup>b</sup>Missing data from 141 UK and 232 US respondents on Income Level

### Outcomes:

A limited sample of respondents from each country (n=471 UK and 1,486 US) answered the question “How confident are you that you can control and manage your health problems?” Over 90% of this limited pool of respondents in both regions answered “very confident” or “confident,” so a statistical comparison was not meaningful, and that question was removed from the final analysis. Results of the other two confidence questions, “How confident are you that if you become seriously ill, you will receive the most effective treatment, including drugs and diagnostic tests?” and “How confident are you that if you become seriously ill, you will be able to afford the care you need?” are described as follows.

#### Confidence in receiving effective treatment:

Overall, the differences between the UK and the US for responses on confidence in receiving effective treatment were significant for both chi-square and Mann-Whitney U tests (Table 2).

Table 2. Survey responses to the question:

How confident are you that if you become seriously ill, you will receive the most effective treatment, including drugs and diagnostic tests?

|                                                                   | Confidence Level (%) |           |                    |                      |          |                   | $\chi^2$ | Mann-Whitney U | Kruskal-Wallis |
|-------------------------------------------------------------------|----------------------|-----------|--------------------|----------------------|----------|-------------------|----------|----------------|----------------|
|                                                                   | Very confident       | Confident | Not very confident | Not at all confident | Not sure | Decline to answer |          |                |                |
| Comparison between Region/Country <sup>a</sup>                    |                      |           |                    |                      |          |                   | p<0.001* | p<0.001*       |                |
| United Kingdom                                                    | 32.0%                | 61.3%     | 5.6%               | 0.7%                 | 0.4%     | 0.0%              |          |                |                |
| United States                                                     | 34.6%                | 38.7%     | 16.0%              | 9.1%                 | 1.3%     | 0.3%              |          |                |                |
| Comparison between Residence Types <sup>b</sup>                   |                      |           |                    |                      |          |                   | p=0.004* |                | p=0.004*       |
| Rural                                                             | 32.0%                | 51.2%     | 10.2%              | 5.2%                 | 1.2%     | 0.1%              |          |                |                |
| Suburban                                                          | 35.9%                | 44.9%     | 12.4%              | 5.6%                 | 1.0%     | 0.2%              |          |                |                |
| Urban                                                             | 31.7%                | 46.3%     | 13.8%              | 7.2%                 | 0.6%     | 0.4%              |          |                |                |
| Comparison within Residence Types, by Region/Country <sup>c</sup> |                      |           |                    |                      |          |                   |          |                |                |
| Rural                                                             |                      |           |                    |                      |          |                   | p<0.001* | p<0.001*       |                |
| Suburban                                                          |                      |           |                    |                      |          |                   | p<0.001* | p=0.009*       |                |
| Urban                                                             |                      |           |                    |                      |          |                   | p<0.001* | p<0.001*       |                |
| Comparison within Region/Country, by Residence Types <sup>d</sup> |                      |           |                    |                      |          |                   |          |                |                |
| United Kingdom                                                    |                      |           |                    |                      |          |                   | p=0.817  |                | p=0.781        |

United States

p=0.003\*

p=0.001\*

<sup>a,c</sup>Chi-square and Mann-Whitney U tests<sup>b,d</sup>Chi-square and Kruskal-Wallis tests

Ninety-three percent (93.3%) of UK residents were confident or very confident in receiving effective treatment, compared with 73.3% of US residents. Within residence types, Mann-Whitney and chi-square tests revealed statistically significant differences between countries (all  $p < 0.01$ ). Among residence types overall, differences were also significant based on both chi-square and Kruskal-Wallis tests. Within each country, there were only statistically significant differences by residence type in the US ( $\chi^2 p = 0.003$ , Kruskal-Wallis  $p = 0.001$ ) and not in the UK ( $\chi^2 p = 0.817$ , Kruskal-Wallis  $p = 0.781$ ).

### Confidence in affording care:

Statistically significant differences were found between the UK and US via chi-square and Mann-Whitney tests (Table 3).

Table 3. Survey responses to the question:

How confident are you that if you become seriously ill, you will be able to afford the care you need?

|                                                                   | Confidence Level (%) |           |                    |                      |          |                   | $\chi^2$ | Mann-Whitney U | Kruskal-Wallis |
|-------------------------------------------------------------------|----------------------|-----------|--------------------|----------------------|----------|-------------------|----------|----------------|----------------|
|                                                                   | Very confident       | Confident | Not very confident | Not at all confident | Not sure | Decline to answer |          |                |                |
| Comparison between Region/Country <sup>a</sup>                    |                      |           |                    |                      |          |                   | p<0.001* | p<0.001*       |                |
| United Kingdom                                                    | 33.8%                | 57.2%     | 6.6%               | 0.6%                 | 1.9%     | 0.0%              |          |                |                |
| United States                                                     | 26.6%                | 35.0%     | 22.4%              | 13.6%                | 2.1%     | 0.3%              |          |                |                |
| Comparison between Residence Types <sup>b</sup>                   |                      |           |                    |                      |          |                   | p=0.002* |                | p=0.388        |
| Rural                                                             | 27.5%                | 47.7%     | 15.4%              | 6.8%                 | 2.5%     | 0.1%              |          |                |                |
| Suburban                                                          | 30.7%                | 41.5%     | 17.1%              | 8.7%                 | 1.7%     | 0.3%              |          |                |                |
| Urban                                                             | 29.1%                | 41.4%     | 16.6%              | 11.0%                | 1.8%     | 0.1%              |          |                |                |
| Comparison within Residence Types, by Region/Country <sup>c</sup> |                      |           |                    |                      |          |                   |          |                |                |
| Rural                                                             |                      |           |                    |                      |          |                   | p<0.001* | p<0.001*       |                |
| Suburban                                                          |                      |           |                    |                      |          |                   | p<0.001* | p<0.001*       |                |
| Urban                                                             |                      |           |                    |                      |          |                   | p<0.001* | p<0.001*       |                |
| Comparison within Region/Country, by Residence Types <sup>d</sup> |                      |           |                    |                      |          |                   |          |                |                |
| United Kingdom                                                    |                      |           |                    |                      |          |                   | p=0.339  |                | p=0.084        |
| United States                                                     |                      |           |                    |                      |          |                   | p=0.001* |                | p=0.001*       |

<sup>a,c</sup>Chi-square and Mann-Whitney U tests<sup>b,d</sup>Chi-square and Kruskal-Wallis tests

In the UK, 91% of respondents were confident or very confident in their ability to afford healthcare, versus 61.6% in the US. Within residence types there were also statistically significant differences. Among residence types overall, there were only statistically significant differences based the chi-square test, not on the Kruskal-Wallis. Within the UK and US, as for the effective treatment question, differences in confidence based on residence type were only

1  
2  
3 statistically significant for US respondents (US:  $\chi^2$   $p=0.001$ , Kruskal-Wallis  $p=0.001$ ; UK  $\chi^2$   
4  $p=0.339$ , Kruskal-Wallis  $p=0.084$ ).  
5  
6

7 A descriptive analysis of responses by residence type in the US revealed that suburban  
8 respondents had the highest percentage (76.3%) of confident or very confident ratings in  
9 effectiveness of treatment, versus 69.4% in rural areas and 70.4% in urban areas. Regarding  
10 ability to afford treatment in the US, 65.4% of suburban residents were confident or very  
11 confident, compared with 56.8% in rural areas and 58.2% in urban areas.  
12

### 13 **DISCUSSION:**

14 Significant differences were found between the UK and the US in health confidence. Suburban  
15 residents in the US expressed higher confidence in both receiving effective treatment and  
16 affording care than their rural and urban counterparts; however, overall confidence in the US was  
17 significantly lower than in the UK, where residence type did not have an effect. The effect of the  
18 overall difference between residence types may be moderated by the lack of difference in the  
19 UK. Our findings are supported by a previous study which found that in the UK the public is  
20 happier than in the US (and other countries surveyed) regarding their healthcare system and are  
21 least likely to be worried about future health care needs.[31] Higher confidence in healthcare in  
22 the UK than in the US may be related to differences between healthcare systems, to cultural and  
23 political differences, or to differing social norms that may influence interpretations in answering  
24 questions about confidence. Examining causes for higher or lower respondent confidence could  
25 illuminate future directions for health system decision makers in both regions.  
26  
27  
28  
29

30 In addition to exploring the causes for relative confidence levels in regions, these findings also  
31 warrant closer examination of the different confidence levels among residence types within the  
32 US. Lower confidence in the rural US may not be simply attributable to health insurance  
33 coverage, as rural US coverage is highly variable.[32] Other factors such as income,  
34 race/ethnicity, age, and socio-cultural factors may combine to influence rural confidence.[32]  
35 The larger percentage of suburban Americans who rated their confidence as high implies that  
36 factors in the suburban environment may contribute to a sense of control or reliability. While  
37 disparities in access, safety, and quality of care between rural and urban areas are well-  
38 documented,[33, 34] our findings suggest that exploring the suburban healthcare environment  
39 could provide insight into US healthcare attitudes, especially given that 50% of Americans live  
40 in suburban areas.[35] Studies have explored rural, suburban, and urban localities as factors in  
41 health information management,[36] minority access to care,[37] and telemedicine  
42 satisfaction[38] with varying results for each measure. More targeted research on place of  
43 residence in health care confidence and quality may be advisable.  
44  
45  
46  
47

48 This analysis contributes to an ongoing discourse about the advantages and disadvantages of UK  
49 and US healthcare systems by calling attention to the role of patient perspectives in this  
50 conversation. How end users perceive their system to be serving them or accessible to them is an  
51 important factor in assessing, maintaining, and revising healthcare legislation, pricing, standards  
52 of care, and communication frameworks. Data on confidence, particularly in patient assessments  
53 of future or hypothetical health circumstances, provide insight into how patients might make  
54 decisions in planning and paying for health care. Such data also provide a potential gauge of  
55 public response to policies affecting healthcare. Our findings that UK residents have greater self-  
56  
57  
58  
59  
60



1  
2  
3 reported confidence in healthcare might suggest higher levels of perceived reliability and system  
4 stability in their single-payer system as well as a perspective of confidence as a social norm. The  
5 outcomes determined here may be viewed not only as markers of patients' personal experiences  
6 with health care, but also as indicators of the sociocultural context in which each healthcare  
7 system functions. Comparing responses to confidence questions with responses about insurance  
8 status, accessibility of care, and personal factors such as income and age could be an area for  
9 follow up research that could clarify the extent to which expressions of confidence might be  
10 associated with system features versus other factors.  
11  
12

13  
14 We acknowledge the inability to assess wholly the concept of confidence. Confidence in one  
15 group may not be generalizable to another for semantic, cultural, and situational reasons.  
16 However, confidence can serve as a useful proxy for understanding patient attitudes and  
17 behaviors and has implications distinct from other more commonly discussed notions such as  
18 satisfaction or trust, in that confidence implies components of self-efficacy. For both populations  
19 sampled in this study, data was gathered from English-speaking respondents who answered  
20 survey questions about confidence written in English, and both groups received the questions  
21 worded identically, providing some consistency in how confidence might be interpreted here  
22 across groups.  
23  
24

25  
26 There remain a number of constraints and limitations on our data and subsequent conclusions  
27 which must be taken into consideration. The issue of confidence itself is somewhat troublesome  
28 given its inherently subjective nature and the myriad factors that can contribute to individual  
29 confidence. Age, gender, ethnicity, education, socioeconomic status, health status, and health  
30 literacy are just a few of the many factors that can potentially contribute to confidence in  
31 healthcare, and each might also serve as a potential confounder. Notably, two of the three  
32 Commonwealth Fund questions involve notions of personal forecasting ("if I become seriously  
33 ill, then..."), which may be more subject to biases than questions about conditions that are  
34 already present.  
35  
36

37  
38 The definition of "rurality" can be problematic, especially given the disparate categories for the  
39 UK and US. Although the recoding of these categories to combine "village/ rural area" and  
40 "small town" in the UK was rather simple, definitions of what constitutes rural, suburban, and  
41 other descriptors varies culturally and contextually. It is also notable that four healthcare systems  
42 are included in the Commonwealth Fund's category for the UK. Scotland, Wales, Northern  
43 Ireland, and England each maintain unique healthcare systems, and despite their similarities,  
44 distinctions should be acknowledged when assigning value to UK health system effectiveness  
45 and quality in comparison with the US. For example, while universal registration for primary  
46 care is consistent across the four countries' health systems, there are key differences in  
47 prescription charges from country to country and in how each country is implementing recent  
48 reforms.[39] In addition to considering these distinct countries in future comparisons, other  
49 health care systems such as Canada's, which combines public funding with private sector  
50 delivery[40], could provide a useful point of comparison for future analyses of confidence in  
51 health care.  
52  
53  
54

## 55 **CONCLUSION:**

56 Our analyses revealed significant differences between the UK and the US in self-reported  
57  
58  
59  
60

1  
2  
3 confidence levels, suggesting a disparity between these regions and their systems in the provision  
4 of equitable healthcare to all residents. Suburban healthcare in the US should be further  
5 examined to identify why it is associated with higher patient confidence levels. The findings of  
6 this study build on existing literature and may provide insight for policy developers and health  
7 practitioners working with rural, suburban, and urban communities. Patient confidence would be  
8 an interesting and culturally relevant measure for future survey projects to explore in more detail.  
9  
10

11 **ACKNOWLEDGEMENTS:**

12 The authors wish to thank Cathy Schoen, Michelle Doty, Robin Osborn, David Squires, and  
13 Kristof Stremikis from the Commonwealth Fund for providing the data set and input on the final  
14 draft of this manuscript.  
15  
16

17 **COMPETING INTERESTS:** None to declare.  
18  
19

20 **FUNDING:** None of the authors have an actual or potential financial or commercial conflict of  
21 interest with the information presented in this manuscript.  
22  
23

24 **DATA SHARING:** There is no additional data available.  
25  
26

27 **STATEMENT OF ETHICS:** Ethics approval was not required for this study.  
28  
29  
30  
31  
32  
33  
34  
35  
36  
37  
38  
39  
40  
41  
42  
43  
44  
45  
46  
47  
48  
49  
50  
51  
52  
53  
54  
55  
56  
57  
58  
59  
60

## REFERENCES

- 1 Epstein RM, Street RL Jr. The values and value of patient-centered care. *Ann Fam Med* 2011;**9**(2):100-3.
- 2 Snyder CF, Aaronson NK, Choucair AK, et al. Implementing patient-reported outcomes assessment in clinical practice: a review of the options and considerations. *Qual Life Res* 2012; **21**(8):1305-14.
- 3 Rathert C, Wyrwich MD, Boren SA. Patient-centered care and outcomes: a systematic review of the literature. *Med Care Res Rev* Published Online First: 20 November 2012. doi:10.1177/1077558712465774.
- 4 Aiken LH, Sermeus W, Van den Heede K, et al. Patient safety, satisfaction, and quality of hospital care: cross sectional surveys of nurses and patients in 12 countries in Europe and the United States. *BMJ* 2012;Mar 20(344:e1717) doi:10.1136/bmj.e1717.
- 5 Campbell SM, Kontopantelis E, Reeves D, et al. Changes in patient experiences of primary care during health service reforms in England between 2003 and 2007. *Ann Fam Med* 2010; **8**(6):499-506.
- 6 Brooks-Carthon JM, Kutney-Lee A, Sloane DM, et al. Quality of care and patient satisfaction in hospitals with high concentrations of black patients. *J Nurs Scholarsh* 2011; **43**(3):301-310.
- 7 Employee Benefit Research Institute. Health Confidence Survey: Most Americans Unfamiliar With Key Aspects of Health Reform. *EBRI Notes* 2011;**32**(9):1-22.
- 8 Borders TF, Lensing S, Xu KT. Health confidence and racial and ethnic disparities in consumers' assessments of health care. *Am J Med Qual* 2011;**26**(3):220-8.
- 9 Tataw DB, Bazargan-Hejazi S, James FW. Health services utilization, satisfaction, and attachment to a regular source of care among participants in an urban health provider alliance. *J Health Hum Serv Adm* 2011;**34**(1):109-41.
- 10 Frei A, Svarin A, Steurer-Stey C, Puhan MA. Self-efficacy instruments for patients with chronic diseases suffer from methodological limitations--a systematic review. *Health Qual Life Outcomes* 2009;**7**:86
- 11 Oxford English Dictionary Online [Internet]. Oxford University Press. Updated December 2012. Accessed March 6, 2013 from <http://www.oed.com.ezproxy1.library.arizona.edu/view/Entry/38806?rskey=aQhOZt&result=1&isAdvanced=false>.
- 12 Bandura A, Adams NE, Beyer J. Cognitive processes mediating behavioral change. *J Pers Soc Psychol* 1977;**35**(3):125-39.

- 1  
2  
3 13 American Medical Association [Internet]. Patient Satisfaction/Experience. Accessed March  
4 12, 2013 from [http://www.ama-assn.org/ama/pub/physician-resources/practice-management-](http://www.ama-assn.org/ama/pub/physician-resources/practice-management-center/practice-operations/patient-satisfaction-experience.page)  
5 [center/practice-operations/patient-satisfaction-experience.page](http://www.ama-assn.org/ama/pub/physician-resources/practice-management-center/practice-operations/patient-satisfaction-experience.page).  
6  
7  
8 14 Robert Wood Johnson Foundation. RWJF Health Care Consumer Confidence Index: July  
9 2009; Accessed January 9, 2013 from <http://www.rwjf.org/healthpolicy/product.jsp?id=47328>.  
10  
11 15 The New York Times [Internet]. Times Topics: Health Care Reform. Accessed March 12,  
12 2013 from  
13 [http://topics.nytimes.com/top/news/health/diseasesconditionsandhealthtopics/health\\_insurance\\_a](http://topics.nytimes.com/top/news/health/diseasesconditionsandhealthtopics/health_insurance_and_managed_care/health_care_reform/index.html)  
14 [nd\\_managed\\_care/health\\_care\\_reform/index.html](http://topics.nytimes.com/top/news/health/diseasesconditionsandhealthtopics/health_insurance_and_managed_care/health_care_reform/index.html).  
15  
16  
17 16 The Wall Street Journal [Internet]. Topics: Health Reform. Accessed March 12, 2013 from  
18 <http://topics.wsj.com/subject/H/health-reform/1662>.  
19  
20  
21 17 Rosenstock IM. Why people use health services. *Milbank Mem Fund Q* 1966;**44**(3):94-127.  
22  
23 18 Soroka S, Maioni A, Martin P. What moves public opinion on health care? Individual  
24 experiences, system performance, and media framing. *J Health Polit Polic Law*. Forthcoming  
25 2013. Accessed March 12, 2013 from  
26 [http://www.snsoroka.com/files/WhatMovesPO\\_JHPPL.pdf](http://www.snsoroka.com/files/WhatMovesPO_JHPPL.pdf).  
27  
28  
29 19 Franco OH, Wong YL, Kandala NB, et al. Cross-cultural comparison of correlates of quality  
30 of life and health status: the Whitehall II Study (UK) and the Western New York Health Study  
31 (US). *Eur J Epidemiol* 2012;**27**(4):255-65.  
32  
33  
34 20 Light D. Universal health care: Lessons from the British experience. *Am J Public Health*  
35 2003;**93**(1):25-30.  
36  
37 21 Banks J, Marmot M, Oldfield Z, Smith JP. Disease and disadvantage in the United States and  
38 in England. *JAMA* 2006;**295**(17):2037-45.  
39  
40  
41 22 Coulter A, Jenkinson C. European patients' views on the responsiveness of health systems and  
42 healthcare providers. *Eur J Public Health* 2005;**15**(4):355-60.  
43  
44  
45 23 Rohrer JE, Borders TF. Healthy skepticism. *Adv Prev Med* 2004;**39**(6):1234-7.  
46  
47 24 Calnan MW, Sanford E. Public trust in health care: the system or the doctor? *Qual Saf Health*  
48 *Care* 2004;**13**(2):92-7.  
49  
50  
51 25 Hesse BW, Nelson DE, Kreps GL, et al. Trust and sources of health information: the impact  
52 of the Internet and its implications for health care providers: findings from the first Health  
53 Information National Trends Survey. *Arch Intern Med* 2005;**165**(22):2618.  
54  
55  
56  
57  
58  
59  
60

- 1  
2  
3 26 Rockers PC, Kruk ME, Laugesen MJ. Perceptions of the health system and public trust in  
4 government in low-and middle-income countries: evidence from the World Health Surveys. *J*  
5 *Health Polit Policy Law* 2012;**37**(3):405-37.  
6  
7  
8 27 Delamater AM. Improving patient adherence. *Clin Diabetes* 2006;**24**(2):71-7.  
9  
10 28 Girotra S, Cram P, Popescu I. Patient satisfaction at America's lowest performing hospitals.  
11 *Circ Cardiovasc Qual Outcomes* 2012;**5**(3):365-72.  
12  
13  
14 29 Levinton C, Veillard J, Slutsky A, Brown A. The importance of place of residence in patient  
15 satisfaction. *Int J Qual Health Care* 2011;**23**(5):495-502.  
16  
17  
18 30 Schoen C, Osborn R, Squires D, et al. How health insurance design affects access to care and  
19 costs, by income, in eleven countries. *Health Aff* 2010;**29**(12):2323-34.  
20  
21 31 Donelan K, Blendon RJ, Schoen C, et al. The cost of health system change: public discontent  
22 in five nations. *Health Aff* 1999;**18**(3):206-16.  
23  
24  
25 32 Kaiser Family Foundation [Internet]. Kaiser Commission on Medicaid and the Uninsured.  
26 Health Insurance Coverage in Rural America. 2003. Accessed March 12, 2013 from  
27 <http://www.kff.org/uninsured/upload/Health-Insurance-Coverage-in-Rural-America-PDF.pdf>.  
28  
29  
30 33 Ryan K, Rahman A. Examining factors influencing patient satisfaction with nurse  
31 practitioners in rural urgent care centers. *J Am Acad Nurse Pract* 2012;**24**(2):77-81.  
32  
33 34 Bennett K, Olatosi B, Probst J. Health Disparities: A Rural-Urban Chartbook. Carolina Rural  
34 Health Research Center, 2008; Accessed January 9, 2013 from  
35 [http://rhr.sph.sc.edu/report\\_by\\_topic.html#1-09](http://rhr.sph.sc.edu/report_by_topic.html#1-09).  
36  
37  
38 35 Hobbs F, Stoops N. Demographic Trends in the 20th Century: Census 2000 Special Reports.  
39 US Census Bureau, 2002; Accessed January 9, 2013 from  
40 <http://www.census.gov/prod/2002pubs/censr-4.pdf>.  
41  
42  
43 36 Lorence D, Chen L. Disparities in health information quality across the rural-urban  
44 continuum: where is coded data more reliable? *J Med Syst* 2008;**32**(1):1-8.  
45  
46 37 Berdahl TA, Kirby JB, Stone RA. Access to health care for nonmetro and metro Latinos of  
47 Mexican origin in the United States. *Med Care* 2007;**45**(7):647-54.  
48  
49 38 Hilty DM, Nesbitt TS, Kuenneth CA, Cruz GM, Hales RE. Rural versus suburban primary  
50 care needs, utilization, and satisfaction with telepsychiatric consultation. *J Rural Health*  
51 2007;**23**(2):163-5.  
52  
53  
54 39 Roland M, Guthrie B, Thomé DC. Primary medical care in the United Kingdom. *J Am Board*  
55 *Fam Med* 2012;**25**(S1):S6-11.  
56  
57  
58  
59  
60

1  
2  
3  
4  
5  
6  
7  
8  
9  
10  
11  
12  
13  
14  
15  
16  
17  
18  
19  
20  
21  
22  
23  
24  
25  
26  
27  
28  
29  
30  
31  
32  
33  
34  
35  
36  
37  
38  
39  
40  
41  
42  
43  
44  
45  
46  
47  
48  
49  
50  
51  
52  
53  
54  
55  
56  
57  
58  
59  
60

40 Shi L, Singh D. Major Characteristics of U.S. Health Care Delivery. In: *Essentials of the U.S. Health Care System*. Sudbury, MA: Jones and Bartlett Publishers; 2010. p. 1-25.

For peer review only

1  
2  
3 **TITLE:** Comparison of health confidence in rural, suburban, and urban areas in the United  
4 Kingdom and the United States: A secondary analysis  
5  
6

7 **SHORT TITLE:** Comparison of health confidence in the United Kingdom and the United States  
8

9 **CORRESPONDING AUTHOR:**

10 Kristen Haven, MA  
11 Mel and Enid Zuckerman College of Public Health  
12 Drachman Hall  
13 The University of Arizona  
14 Tucson, AZ 85721  
15 USA  
16 haven@email.arizona.edu  
17 (520) 834-3402  
18  
19

20  
21 **CO-AUTHORS:**

22 Martín F. Celaya, MPH  
23 Research Specialist  
24 Mel and Enid Zuckerman College of Public Health  
25 The University of Arizona  
26 Tucson, AZ 85721  
27 USA  
28  
29

30 Jaelyn Pierson, MPH, CPH  
31 Director of Data and Research  
32 Nyaya Health  
33 Achham District, Nepal  
34 and 17 West 17th St., 7th Floor  
35 New York, NY 10011  
36 USA  
37  
38

39 Aron J. Weisskopf, MPH  
40 Government Pharmacy Consulting Analyst  
41 Mercer Human Resource Consulting  
42 3131 East Camelback Road  
43 Phoenix, AZ 85016  
44 USA  
45  
46

47  
48 Neil J. MacKinnon, BSc (Pharm), MSc (Pharm), PhD  
49 Professor & The Walter H Pearce Endowed Chair  
50 Director, Center for Rural Health  
51 Mel and Enid Zuckerman College of Public Health  
52 The University of Arizona  
53 Tucson, AZ 85721  
54 USA  
55  
56  
57  
58  
59  
60

**KEYWORDS:**

Confidence  
Health policy  
Healthcare quality  
Patient-centred care  
Patient satisfaction  
Rural  
Urban

**WORD COUNT:** 2,800**ARTICLE SUMMARY**

## 1) Article Focus

- This paper compares consumers' self-reported confidence in health care in the United Kingdom and the United States, using 2010 survey responses gathered by the Commonwealth Fund.
- We sought to determine whether self-reported confidence in healthcare differed between the United Kingdom and the United States, as well as by rurality or urbanicity.

## 2) Key Messages

- We believe that while much current political and academic discourse surrounding healthcare is focused on systems, providers, and policy, patient experience and perception may also be key to understanding and responding to healthcare issues.
- Suburban residents in the US expressed higher confidence in both receiving effective treatment and affording care than their rural and urban counterparts; however, overall confidence in the US was significantly lower than in the UK, where residence type did not have an effect.
- These findings warrant examination of the causes for relative confidence levels in both regions, as well as among residence types within the US. Suburban healthcare in the US should be further examined to identify why it is associated with higher patient confidence levels.

## 3) Strengths and Limitations

*Strengths:*

- Confidence can serve as a useful proxy for understanding patient attitudes and behaviors and has implications distinct from other more commonly discussed notions such as satisfaction or trust, in that confidence implies components of self-efficacy.
- This analysis contributes to an ongoing discourse about healthcare systems by calling attention to the role of patient perspectives in this conversation. Such data provide a potential gauge of public response to policies affecting healthcare.

*Limitations:*

- Confidence is a subjective concept, and interpretations of the concept of confidence in one group may not be generalizable to another for semantic, cultural, and situational reasons.
- Similarly, the definition of "rurality" is not fixed, especially when comparing rural areas across different countries.



**ABSTRACT:**

**Objective:** Confidence in healthcare may influence patients' utilization of healthcare resources and perceptions of healthcare quality. We sought to determine whether self-reported confidence in healthcare differed between the United Kingdom and the United States, as well as by rurality or urbanicity.

**Design:** A secondary analysis of a subset of survey questions regarding self-reported confidence in healthcare from the 2010 Commonwealth Fund International Health Policy Survey.

**Setting:** Telephone survey of participants from the United Kingdom and the United States.

**Participants:** Our final analysis included 1,511 UK residents (688 rural, 446 suburban, 372 urban) and 2,501 US residents (536 rural, 1,294 suburban, 671 urban).

**Outcome measures:** Questions assessed respondents' confidence in the effectiveness and affordability of treatment. We compared survey outcomes from these questions between, and within, the two regions and among, and within, residence types (rural, suburban, and urban).

**Results:** Significant differences were found in self-reported confidence in healthcare between the UK and US, among residence types, and between the two regions within residence types. Reported levels were higher in the UK. Within regions, significant differences by residence type were found for the US but not the UK. Within the US, suburban respondents had the highest self-reported confidence in healthcare.

**Conclusions:** Significant differences exist between the UK and US in confidence in healthcare. In the US but not in the UK, self-reported confidence is related to residence type. Within countries, significant differences by residence type were found for the US but not the UK. Our findings warrant examination of causes for relative confidence levels between regions and among US residence types.

## INTRODUCTION:

A focus on patient-centered care has emerged in recent years in discussions of health care delivery, systems of care, and direct care settings.[1, 2] Patient-centred care is typically defined as care that is responsive to individual patient needs and which facilitates shared decision making among patients, family members, and providers.[3] The patient experience is highly subjective and hinges on emotional, circumstantial, and interpretive factors that are difficult to quantify and compare across groups.

While patient satisfaction has been discussed at some length [4, 5], another subjective measure, the concept of patient confidence in health care, is one that has been understudied thus far. The question of provider confidence in patients' abilities to care for themselves has been studied, but this research did not look into patients' own confidence regarding their health and health care.[6] A survey conducted in the United States (US) explored the public's confidence in affording and accessing care.[7] Another US survey measured respondents' confidence in their ability to overcome disease without medical assistance.[8]

Related issues like patient satisfaction and self-efficacy have been explored in depth,[4, 5, 9, 10] but these notions are distinct from confidence. Confidence is defined as assurance or reliance on oneself, on other people or on things, or in circumstances.[11] Self-efficacy is related to personal sense of capacity/capability,[12] while satisfaction is a response or impression following an experience.[13] Consumer confidence in health care has been surveyed,[14] but this is a facet of confidence focused more narrowly on consumer spending. For the purposes of this paper, we draw on the dictionary definition[11] and previous health confidence survey questions[7] to define confidence in healthcare as a person's reliance on and trust in themselves and in their health system in yielding favorable health outcomes.

With the passage and implementation of the Patient Protection and Affordable Care Act in the US, discussions about healthcare have dominated recent political and popular discourse.[15, 16] While the focus often centers around fiscal, cultural, and ethical concerns, the tendency to criticize or praise a healthcare system may also be linked to biases, generalizations, and narratives based on personal experiences and beliefs.[17, 18] Confidence in one's individual health care and in the health system may play a key role in shaping patients' utilization, assessments, and stated desires regarding their health. Single-payer, publicly administered healthcare in the United Kingdom (UK) is often held up as a counterpoint to the more fragmented multi-payer, fee-for-service system in the US;[19, 20, 21] thus a comparison of patient confidence in these two regions could be helpful in better assessing the role of confidence in discussions and decisions pertaining to healthcare.

The UK has been found to have one of the highest levels of patient satisfaction among European countries,[22] and comparisons of health outcomes in the UK and US have explored physical and mental domains of health-related quality of life in the two regions.[23] US-based confidence surveys have explored perceptions and comprehension of health reform[7] and consumer confidence within the US.[14] Building on this research and on public interest in co-examining the UK and US systems, we see value in comparing the two regions on the subjective measure of confidence.

1  
2  
3  
4  
5  
6  
7  
8  
9  
10  
11  
12  
13  
14  
15  
16  
17  
18  
19  
20  
21  
22  
23  
24  
25  
26  
27  
28  
29  
30  
31  
32  
33  
34  
35  
36  
37  
38  
39  
40  
41  
42  
43  
44  
45  
46  
47  
48  
49  
50  
51  
52  
53  
54  
55  
56  
57  
58  
59  
60

Some factors related to confidence [in healthcare](#) include patient satisfaction, medical skepticism, trust in government, health literacy, and management and organization of the healthcare system.[23-26] The efficiency and effectiveness of a healthcare system from a patient's perspective might affect patient adherence to medical therapies, self-efficacy, and determination to improve personal health.[27] In the case of medical skepticism, mistrust in the healthcare system could result in a patient's complete denial of any sort of service, believing that she or he is capable of taking care of their own health with no assistance.[23] Personal characteristics that have been found to influence confidence [in personal health management](#) are disease status, age, insurance coverage/ability to pay, the present health service infrastructure, language and cultural barriers, ethnicity, sex/gender, employment status, and socioeconomic position.[8] These factors may affect a health system's delivery of programs and services if community members do not feel confident in the system's ability to address issues specific to their community. [Rural, lower resource communities with poorer system performance have been associated with low patient satisfaction](#),[28] and a Canadian study found that place of residence contributed to patient satisfaction.[29] Factors such as perceived or actual facility or system performance and residence type may influence patient confidence in healthcare.

We sought to determine whether self-reported confidence in healthcare differed between the United Kingdom and the United States, as well as by rurality or urbanicity.

#### **METHODS:**

Between March and June of 2010, the Commonwealth Fund's International Health Policy Survey was conducted via telephone surveys in 11 countries and from which we used data from the United Kingdom and the United States.[30] The survey contained questions about health and health care experiences, perceptions, coverage, and costs. Households in both the UK and the US were selected using random digit dialing, and both samples were drawn to be representative of the geographic population distribution in each country or region.[30] Alaska and Hawaii were excluded from the US survey. Collection methods are further described elsewhere.[30]

For this analysis, residence categorization data from the UK was recoded from four categories into three categories for side-by-side comparison with the US. American respondents were categorized as living in either a rural, suburban, or urban area. UK respondents were originally categorized as living in a village/rural area, a small town, a large town or suburb of a city, or an urban area. Village/rural area and small town were combined into one "rural" group.

Three questions in the survey sought to assess participants' confidence levels. These questions were: 1. "How confident are you that if you become seriously ill, you will receive the most effective treatment, including drugs and diagnostic tests?" 2. "How confident are you that if you become seriously ill, you will be able to afford the care you need?" and 3. How confident are you that you can control and manage your health problems?" Responses to all three questions were measured on a six-item Likert scale with the items "very confident," "confident," "not very confident," "not at all confident," "unsure," and "decline to answer."

Pearson's chi-square tests were used to compare relative frequencies between and within regions and between and within residence types. To compare data ordinally, rank sum tests were also conducted. Mann-Whitney U tests measured differences between the UK and US overall, as well as between the UK and US within each residence type. Kruskal-Wallis tests were used for rank-

sum comparisons between residence types overall and between residence types within each region or country. Significance was set at  $p \leq 0.05$ . All statistical analyses were conducted using Stata, Version 12 (StataCorp. 2011. Stata Statistical Software: Release 12. College Station, TX: StataCorp LP).

## RESULTS:

### Participants:

One thousand, five hundred and eleven (1,511) UK residents and 2,501 US residents responded to the survey. The UK response rate was 24%, and the US response rate was 26%. [16] Eighty-seven percent (86.8%) of UK and 77.0% of US respondents identified as white. Women made up 48.4% of the UK sample and 61.7% of the US respondents. Forty-six percent (45.5%) of UK respondents lived in rural areas or small towns. Only 21.4% of US respondents identified their residence as rural, while over half (51.7%) lived in suburban areas. Demographics are described further in Table 1. Data was missing for five UK respondents on residence type, so these five participants were excluded from the data analysis.

Table 1. Demographic Characteristics, by Region/Country of Residence and Residence Type

| Region/Country of Residence               | United Kingdom          |          |       | United States |          |       |
|-------------------------------------------|-------------------------|----------|-------|---------------|----------|-------|
|                                           | n=1511                  |          |       | n=2501        |          |       |
| Residence Type <sup>a</sup>               | Rural/<br>Small<br>Town | Suburban | Urban | Rural         | Suburban | Urban |
|                                           | 688                     | 446      | 372   | 536           | 1294     | 671   |
| Age                                       |                         |          |       |               |          |       |
| 18-29                                     | 215                     | 118      | 117   | 32            | 73       | 63    |
| 30-49                                     | 235                     | 185      | 162   | 149           | 370      | 209   |
| 50-64                                     | 131                     | 93       | 51    | 171           | 431      | 192   |
| 65+                                       | 107                     | 50       | 42    | 184           | 420      | 207   |
| Gender                                    |                         |          |       |               |          |       |
| Male                                      | 358                     | 229      | 188   | 201           | 516      | 240   |
| Female                                    | 330                     | 217      | 184   | 335           | 778      | 431   |
| Income Level <sup>b</sup>                 |                         |          |       |               |          |       |
| Much below average                        | 26                      | 6        | 17    | 106           | 196      | 130   |
| Somewhat below average                    | 109                     | 70       | 46    | 112           | 203      | 114   |
| Average                                   | 345                     | 234      | 171   | 139           | 262      | 154   |
| Somewhat above average                    | 95                      | 111      | 99    | 101           | 339      | 131   |
| Much above average                        | 12                      | 6        | 18    | 33            | 165      | 84    |
| Race/Ethnicity                            |                         |          |       |               |          |       |
| White, Non-Hispanic                       |                         |          |       | 450           | 1031     | 445   |
| Black, Non-Hispanic                       |                         |          |       | 33            | 59       | 83    |
| Hispanic                                  |                         |          |       | 26            | 96       | 73    |
| White (British, Irish, Other<br>European) | 610                     | 388      | 314   |               |          |       |

|                                                                                                       |    |    |    |
|-------------------------------------------------------------------------------------------------------|----|----|----|
| Mixed (White and Black Caribbean,<br>White and Black African, White<br>and<br>Asian, Any Other Mixed) | 54 | 36 | 31 |
| Asian or Asian British                                                                                | 10 | 8  | 14 |
| Black or Black British                                                                                | 8  | 14 | 9  |
| Chinese                                                                                               | 1  | 0  | 3  |
| Other                                                                                                 | 2  | 0  | 1  |
| Decline to answer                                                                                     | 3  | 0  | 0  |

<sup>a</sup>Missing data from 5 UK respondents on Residence Type

<sup>b</sup>Missing data from 141 UK and 232 US respondents on Income Level

### Outcomes:

A limited sample of respondents from each country (n=471 UK and 1,486 US) answered the question “How confident are you that you can control and manage your health problems?” Over 90% of this limited pool of respondents in both regions answered “very confident” or “confident,” so a statistical comparison was not meaningful, and that question was removed from the final analysis. Results of the other two confidence questions, “How confident are you that if you become seriously ill, you will receive the most effective treatment, including drugs and diagnostic tests?” and “How confident are you that if you become seriously ill, you will be able to afford the care you need?” are described as follows.

#### Confidence in receiving effective treatment:

Overall, the differences between the UK and the US for responses on confidence in receiving effective treatment were significant for both chi-square and Mann-Whitney U tests (Table 2).

Table 2. Survey responses to the question:

How confident are you that if you become seriously ill, you will receive the most effective treatment, including drugs and diagnostic tests?

|                                                                   | Confidence Level (%) |           |                    |                      |          |                   | $\chi^2$ | Mann-Whitney U | Kruskal-Wallis |
|-------------------------------------------------------------------|----------------------|-----------|--------------------|----------------------|----------|-------------------|----------|----------------|----------------|
|                                                                   | Very confident       | Confident | Not very confident | Not at all confident | Not sure | Decline to answer |          |                |                |
| Comparison between Region/Country <sup>a</sup>                    |                      |           |                    |                      |          |                   | p<0.001* | p<0.001*       |                |
| United Kingdom                                                    | 32.0%                | 61.3%     | 5.6%               | 0.7%                 | 0.4%     | 0.0%              |          |                |                |
| United States                                                     | 34.6%                | 38.7%     | 16.0%              | 9.1%                 | 1.3%     | 0.3%              |          |                |                |
| Comparison between Residence Types <sup>b</sup>                   |                      |           |                    |                      |          |                   | p=0.004* |                | p=0.004*       |
| Rural                                                             | 32.0%                | 51.2%     | 10.2%              | 5.2%                 | 1.2%     | 0.1%              |          |                |                |
| Suburban                                                          | 35.9%                | 44.9%     | 12.4%              | 5.6%                 | 1.0%     | 0.2%              |          |                |                |
| Urban                                                             | 31.7%                | 46.3%     | 13.8%              | 7.2%                 | 0.6%     | 0.4%              |          |                |                |
| Comparison within Residence Types, by Region/Country <sup>c</sup> |                      |           |                    |                      |          |                   |          |                |                |
| Rural                                                             |                      |           |                    |                      |          |                   | p<0.001* | p<0.001*       |                |
| Suburban                                                          |                      |           |                    |                      |          |                   | p<0.001* | p=0.009*       |                |
| Urban                                                             |                      |           |                    |                      |          |                   | p<0.001* | p<0.001*       |                |
| Comparison within Region/Country, by Residence Types <sup>d</sup> |                      |           |                    |                      |          |                   |          |                |                |
| United Kingdom                                                    |                      |           |                    |                      |          |                   | p=0.817  |                | p=0.781        |

United States

p=0.003\*

p=0.001\*

<sup>a,c</sup>Chi-square and Mann-Whitney U tests<sup>b,d</sup>Chi-square and Kruskal-Wallis tests

Ninety-three percent (93.3%) of UK residents were confident or very confident in receiving effective treatment, compared with 73.3% of US residents. Within residence types, Mann-Whitney and chi-square tests revealed statistically significant differences between countries (all  $p < 0.01$ ). Among residence types overall, differences were also significant based on both chi-square and Kruskal-Wallis tests. Within each country, there were only statistically significant differences by residence type in the US ( $\chi^2 p = 0.003$ , Kruskal-Wallis  $p = 0.001$ ) and not in the UK ( $\chi^2 p = 0.817$ , Kruskal-Wallis  $p = 0.781$ ).

Confidence in affording care:

Statistically significant differences were found between the UK and US via chi-square and Mann-Whitney tests (Table 3).

Table 3. Survey responses to the question:

How confident are you that if you become seriously ill, you will be able to afford the care you need?

|                                                                   | Confidence Level (%) |           |                    |                      |          |                   | $\chi^2$ | Mann-Whitney U | Kruskal-Wallis |
|-------------------------------------------------------------------|----------------------|-----------|--------------------|----------------------|----------|-------------------|----------|----------------|----------------|
|                                                                   | Very confident       | Confident | Not very confident | Not at all confident | Not sure | Decline to answer |          |                |                |
| Comparison between Region/Country <sup>a</sup>                    |                      |           |                    |                      |          |                   | p<0.001* | p<0.001*       |                |
| United Kingdom                                                    | 33.8%                | 57.2%     | 6.6%               | 0.6%                 | 1.9%     | 0.0%              |          |                |                |
| United States                                                     | 26.6%                | 35.0%     | 22.4%              | 13.6%                | 2.1%     | 0.3%              |          |                |                |
| Comparison between Residence Types <sup>b</sup>                   |                      |           |                    |                      |          |                   | p=0.002* |                | p=0.388        |
| Rural                                                             | 27.5%                | 47.7%     | 15.4%              | 6.8%                 | 2.5%     | 0.1%              |          |                |                |
| Suburban                                                          | 30.7%                | 41.5%     | 17.1%              | 8.7%                 | 1.7%     | 0.3%              |          |                |                |
| Urban                                                             | 29.1%                | 41.4%     | 16.6%              | 11.0%                | 1.8%     | 0.1%              |          |                |                |
| Comparison within Residence Types, by Region/Country <sup>c</sup> |                      |           |                    |                      |          |                   |          |                |                |
| Rural                                                             |                      |           |                    |                      |          |                   | p<0.001* | p<0.001*       |                |
| Suburban                                                          |                      |           |                    |                      |          |                   | p<0.001* | p<0.001*       |                |
| Urban                                                             |                      |           |                    |                      |          |                   | p<0.001* | p<0.001*       |                |
| Comparison within Region/Country, by Residence Types <sup>d</sup> |                      |           |                    |                      |          |                   |          |                |                |
| United Kingdom                                                    |                      |           |                    |                      |          |                   | p=0.339  |                | p=0.084        |
| United States                                                     |                      |           |                    |                      |          |                   | p=0.001* |                | p=0.001*       |

<sup>a,c</sup>Chi-square and Mann-Whitney U tests<sup>b,d</sup>Chi-square and Kruskal-Wallis tests

In the UK, 91% of respondents were confident or very confident in their ability to afford healthcare, versus 61.6% in the US. Within residence types there were also statistically significant differences. Among residence types overall, there were only statistically significant differences based the chi-square test, not on the Kruskal-Wallis. Within the UK and US, as for the effective treatment question, differences in confidence based on residence type were only

1  
2  
3 statistically significant for US respondents (US:  $\chi^2$   $p=0.001$ , Kruskal-Wallis  $p=0.001$ ; UK  $\chi^2$   
4  $p=0.339$ , Kruskal-Wallis  $p=0.084$ ).  
5  
6

7 A descriptive analysis of responses by residence type in the US revealed that suburban  
8 respondents had the highest percentage (76.3%) of confident or very confident ratings in  
9 effectiveness of treatment, versus 69.4% in rural areas and 70.4% in urban areas. Regarding  
10 ability to afford treatment in the US, 65.4% of suburban residents were confident or very  
11 confident, compared with 56.8% in rural areas and 58.2% in urban areas.  
12

### 13 **DISCUSSION:**

14 Significant differences were found between the UK and the US in health confidence. Suburban  
15 residents in the US expressed higher confidence in both receiving effective treatment and  
16 affording care than their rural and urban counterparts; however, overall confidence in the US was  
17 significantly lower than in the UK, where residence type did not have an effect. The effect of the  
18 overall difference between residence types may be moderated by the lack of difference in the  
19 UK. Our findings are supported by a previous study which found that in the UK the public is  
20 happier than in the US (and other countries surveyed) regarding their healthcare system and are  
21 least likely to be worried about future health care needs.[31] [Higher confidence in healthcare in  
22 the UK than in the US may be related to differences between healthcare systems, to cultural and  
23 political differences, or to differing social norms that may influence interpretations in answering  
24 questions about confidence. Examining causes for higher or lower respondent confidence could  
25 illuminate future directions for health system decision makers in both regions.](#)  
26  
27  
28  
29

30 [In addition to exploring the causes for relative confidence levels in regions, these findings also  
31 warrant closer examination of the different confidence levels among residence types within the  
32 US. Lower confidence in the rural US may not be simply attributable to health insurance  
33 coverage, as rural US coverage is highly variable.\[32\] Other factors such as income,  
34 race/ethnicity, age, and socio-cultural factors may combine to influence rural confidence.\[32\]](#)  
35 [The larger percentage of suburban Americans who rated their confidence as high implies that  
36 factors in the suburban environment may contribute to a sense of control or reliability. While  
37 disparities in access, safety, and quality of care between rural and urban areas are well-  
38 documented,\[33, 34\] our findings suggest that exploring the suburban healthcare environment  
39 could provide insight into US healthcare attitudes, especially given that 50% of Americans live  
40 in suburban areas.\[35\] Studies have explored rural, suburban, and urban localities as factors in  
41 health information management,\[36\] minority access to care,\[37\] and telemedicine  
42 satisfaction\[38\] with varying results for each measure. More targeted research on place of  
43 residence in health care confidence and quality may be advisable.](#)  
44  
45  
46  
47

48 This analysis contributes to an ongoing discourse about [the advantages and disadvantages of UK  
49 and US healthcare systems](#) by calling attention to the role of patient perspectives in this  
50 conversation. How end users perceive their system to be serving them or accessible to them is an  
51 important factor in assessing, maintaining, and revising healthcare legislation, pricing, standards  
52 of care, and communication frameworks. Data on confidence, particularly in patient assessments  
53 of future or hypothetical health circumstances, provide insight into how patients might make  
54 decisions in planning and paying for health care. Such data also provide a potential gauge of  
55 public response to policies affecting healthcare. Our findings that UK residents have greater self-  
56  
57  
58  
59  
60

1  
2  
3 reported confidence in healthcare might suggest higher levels of perceived [reliability and](#) system  
4 stability [in their single-payer system](#) as well as a perspective of confidence as a social norm. The  
5 outcomes determined here may be viewed not only as markers of patients' personal experiences  
6 with health care, but also as indicators of the sociocultural context in which each healthcare  
7 system functions. [Comparing responses to confidence questions with responses about insurance](#)  
8 [status, accessibility of care, and personal factors such as income and age could be an area for](#)  
9 [follow up research that could clarify the extent to which expressions of confidence might be](#)  
10 [associated with system features versus other factors.](#)  
11  
12

13  
14 We acknowledge the inability to assess wholly the concept of confidence. Confidence in one  
15 group may not be generalizable to another for semantic, cultural, and situational reasons.  
16 However, confidence can serve as a useful proxy for understanding patient attitudes and  
17 behaviors and has implications distinct from other more commonly discussed notions such as  
18 satisfaction or trust, in that confidence implies components of self-efficacy. For both populations  
19 sampled in this study, data was gathered from English-speaking respondents who answered  
20 survey questions about confidence written in English, and both groups received the questions  
21 worded identically, providing some consistency in how confidence might be interpreted here  
22 across groups.  
23  
24

25  
26 There remain a number of constraints and limitations on our data and subsequent conclusions  
27 which must be taken into consideration. The issue of confidence itself is somewhat troublesome  
28 given its inherently subjective nature and the myriad factors that can contribute to individual  
29 confidence. Age, gender, ethnicity, education, socioeconomic status, health status, and health  
30 literacy are just a few of the many factors that can potentially contribute to confidence in  
31 healthcare, and each might also serve as a potential confounder. Notably, two of the three  
32 Commonwealth Fund questions involve notions of personal forecasting (“if I become seriously  
33 ill, then...”), which may be more subject to biases than questions about conditions that are  
34 already present.  
35  
36

37  
38 The definition of “rurality” can be problematic, especially given the disparate categories for the  
39 UK and US. Although the recoding of these categories to combine “village/ rural area” and  
40 “small town” in the UK was rather simple, definitions of what constitutes rural, suburban, and  
41 other descriptors varies culturally and contextually. It is also notable that four healthcare systems  
42 are included in the Commonwealth Fund’s category for the UK. Scotland, Wales, Northern  
43 Ireland, and England each maintain unique healthcare systems, and despite their similarities,  
44 [distinctions should be acknowledged](#) when assigning value to UK health system [effectiveness](#)  
45 [and quality](#) in comparison with the US. [For example, while universal registration for primary](#)  
46 [care is consistent across the four countries’ health systems, there are key differences in](#)  
47 [prescription charges from country to country and in how each country is implementing recent](#)  
48 [reforms.\[39\] In addition to considering these distinct countries in future comparisons, other](#)  
49 [health care systems such as Canada’s, which combines public funding with private sector](#)  
50 [delivery\[40\], could provide a useful point of comparison for future analyses of confidence in](#)  
51 [health care.](#)  
52  
53  
54

## 55 CONCLUSION:

56 Our analyses revealed significant differences between the UK and the US in self-reported  
57  
58  
59  
60



1  
2  
3 confidence levels, suggesting a disparity between these regions and their systems in the provision  
4 of equitable healthcare to all residents. Suburban healthcare in the US should be further  
5 examined to identify why it is associated with higher patient confidence levels. The findings of  
6 this study build on existing literature and may provide insight for policy developers and health  
7 practitioners working with rural, suburban, and urban communities. Patient confidence would be  
8 an interesting and culturally relevant measure for future survey projects to explore in more detail.  
9  
10

11 **ACKNOWLEDGEMENTS:**

12 The authors wish to thank Cathy Schoen, Michelle Doty, Robin Osborn, David Squires, and  
13 Kristof Stremikis from the Commonwealth Fund for providing the data set and input on the final  
14 draft of this manuscript.  
15  
16

17 **COMPETING INTERESTS:** None to declare.  
18  
19

20 **FUNDING:** None of the authors have an actual or potential financial or commercial conflict of  
21 interest with the information presented in this manuscript.  
22  
23

24 **DATA SHARING:** There is no additional data available.  
25  
26

27 **STATEMENT OF ETHICS:** Ethics approval was not required for this study.  
28  
29  
30  
31  
32  
33  
34  
35  
36  
37  
38  
39  
40  
41  
42  
43  
44  
45  
46  
47  
48  
49  
50  
51  
52  
53  
54  
55  
56  
57  
58  
59  
60

## REFERENCES

- 1 Epstein RM, Street RL Jr. The values and value of patient-centered care. *Ann Fam Med* 2011;**9**(2):100-3.
- 2 Snyder CF, Aaronson NK, Choucair AK, et al. Implementing patient-reported outcomes assessment in clinical practice: a review of the options and considerations. *Qual Life Res* 2012; **21**(8):1305-14.
- 3 Rathert C, Wyrwich MD, Boren SA. Patient-centered care and outcomes: a systematic review of the literature. *Med Care Res Rev* Published Online First: 20 November 2012. doi:10.1177/1077558712465774.
- 4 Aiken LH, Sermeus W, Van den Heede K, et al. Patient safety, satisfaction, and quality of hospital care: cross sectional surveys of nurses and patients in 12 countries in Europe and the United States. *BMJ* 2012;Mar 20(344:e1717) doi:10.1136/bmj.e1717.
- 5 Campbell SM, Kontopantelis E, Reeves D, et al. Changes in patient experiences of primary care during health service reforms in England between 2003 and 2007. *Ann Fam Med* 2010; **8**(6):499-506.
- 6 Brooks-Carthon JM, Kutney-Lee A, Sloane DM, et al. Quality of care and patient satisfaction in hospitals with high concentrations of black patients. *J Nurs Scholarsh* 2011; **43**(3):301-310.
- 7 Employee Benefit Research Institute. Health Confidence Survey: Most Americans Unfamiliar With Key Aspects of Health Reform. *EBRI Notes* 2011;**32**(9):1-22.
- 8 Borders TF, Lensing S, Xu KT. Health confidence and racial and ethnic disparities in consumers' assessments of health care. *Am J Med Qual* 2011;**26**(3):220-8.
- 9 Tataw DB, Bazargan-Hejazi S, James FW. Health services utilization, satisfaction, and attachment to a regular source of care among participants in an urban health provider alliance. *J Health Hum Serv Adm* 2011;**34**(1):109-41.
- 10 Frei A, Svarin A, Steurer-Stey C, Puhan MA. Self-efficacy instruments for patients with chronic diseases suffer from methodological limitations--a systematic review. *Health Qual Life Outcomes* 2009;**7**:86
- 11 Oxford English Dictionary Online [Internet]. Oxford University Press. Updated December 2012. Accessed March 6, 2013 from <http://www.oed.com.ezproxy1.library.arizona.edu/view/Entry/38806?rskey=aQhOZt&result=1&isAdvanced=false>.
- 12 Bandura A, Adams NE, Beyer J. Cognitive processes mediating behavioral change. *J Pers Soc Psychol* 1977;**35**(3):125-39.

1  
2  
3 13 American Medical Association [Internet]. Patient Satisfaction/Experience. Accessed March  
4 12, 2013 from [http://www.ama-assn.org/ama/pub/physician-resources/practice-management-](http://www.ama-assn.org/ama/pub/physician-resources/practice-management-center/practice-operations/patient-satisfaction-experience.page)  
5 [center/practice-operations/patient-satisfaction-experience.page](http://www.ama-assn.org/ama/pub/physician-resources/practice-management-center/practice-operations/patient-satisfaction-experience.page).  
6  
7

8 14 Robert Wood Johnson Foundation. RWJF Health Care Consumer Confidence Index: July  
9 2009; Accessed January 9, 2013 from <http://www.rwjf.org/healthpolicy/product.jsp?id=47328>.  
10

11 15 The New York Times [Internet]. Times Topics: Health Care Reform. Accessed March 12,  
12 2013 from  
13 [http://topics.nytimes.com/top/news/health/diseasesconditionsandhealthtopics/health\\_insurance\\_a](http://topics.nytimes.com/top/news/health/diseasesconditionsandhealthtopics/health_insurance_and_managed_care/health_care_reform/index.html)  
14 [nd\\_managed\\_care/health\\_care\\_reform/index.html](http://topics.nytimes.com/top/news/health/diseasesconditionsandhealthtopics/health_insurance_and_managed_care/health_care_reform/index.html).  
15  
16

17 16 The Wall Street Journal [Internet]. Topics: Health Reform. Accessed March 12, 2013 from  
18 <http://topics.wsj.com/subject/H/health-reform/1662>.  
19  
20

21 17 Rosenstock IM. Why people use health services. *Milbank Mem Fund Q* 1966;**44**(3):94-127.  
22

23 18 Soroka S, Maioni A, Martin P. What moves public opinion on health care? Individual  
24 experiences, system performance, and media framing. *J Health Polit Polic Law*. Forthcoming  
25 2013. Accessed March 12, 2013 from  
26 [http://www.snsoroka.com/files/WhatMovesPO\\_JHPPL.pdf](http://www.snsoroka.com/files/WhatMovesPO_JHPPL.pdf).  
27  
28

29 19 Franco OH, Wong YL, Kandala NB, et al. Cross-cultural comparison of correlates of quality  
30 of life and health status: the Whitehall II Study (UK) and the Western New York Health Study  
31 (US). *Eur J Epidemiol* 2012;**27**(4):255-65.  
32  
33

34 20 Light D. Universal health care: Lessons from the British experience. *Am J Public Health*  
35 2003;**93**(1):25-30.  
36

37 21 Banks J, Marmot M, Oldfield Z, Smith JP. Disease and disadvantage in the United States and  
38 in England. *JAMA* 2006;**295**(17):2037-45.  
39  
40

41 22 Coulter A, Jenkinson C. European patients' views on the responsiveness of health systems and  
42 healthcare providers. *Eur J Public Health* 2005;**15**(4):355-60.  
43  
44

45 23 Rohrer JE, Borders TF. Healthy skepticism. *Adv Prev Med* 2004;**39**(6):1234-7.  
46

47 24 Calnan MW, Sanford E. Public trust in health care: the system or the doctor? *Qual Saf Health*  
48 *Care* 2004;**13**(2):92-7.  
49

50 25 Hesse BW, Nelson DE, Kreps GL, et al. Trust and sources of health information: the impact  
51 of the Internet and its implications for health care providers: findings from the first Health  
52 Information National Trends Survey. *Arch Intern Med* 2005;**165**(22):2618.  
53  
54  
55  
56  
57  
58  
59  
60

- 1  
2  
3 26 Rockers PC, Kruk ME, Laugesen MJ. Perceptions of the health system and public trust in  
4 government in low-and middle-income countries: evidence from the World Health Surveys. *J*  
5 *Health Polit Policy Law* 2012;**37**(3):405-37.  
6  
7  
8 27 Delamater AM. Improving patient adherence. *Clin Diabetes* 2006;**24**(2):71-7.  
9  
10 28 Girotra S, Cram P, Popescu I. Patient satisfaction at America's lowest performing hospitals.  
11 *Circ Cardiovasc Qual Outcomes* 2012;**5**(3):365-72.  
12  
13 29 Levinton C, Veillard J, Slutsky A, Brown A. The importance of place of residence in patient  
14 satisfaction. *Int J Qual Health Care* 2011;**23**(5):495-502.  
15  
16  
17 30 Schoen C, Osborn R, Squires D, et al. How health insurance design affects access to care and  
18 costs, by income, in eleven countries. *Health Aff* 2010;**29**(12):2323-34.  
19  
20  
21 31 Donelan K, Blendon RJ, Schoen C, et al. The cost of health system change: public discontent  
22 in five nations. *Health Aff* 1999;**18**(3):206-16.  
23  
24 32 Kaiser Family Foundation [Internet]. Kaiser Commission on Medicaid and the Uninsured.  
25 Health Insurance Coverage in Rural America. 2003. Accessed March 12, 2013 from  
26 <http://www.kff.org/uninsured/upload/Health-Insurance-Coverage-in-Rural-America-PDF.pdf>.  
27  
28  
29 33 Ryan K, Rahman A. Examining factors influencing patient satisfaction with nurse  
30 practitioners in rural urgent care centers. *J Am Acad Nurse Pract* 2012;**24**(2):77-81.  
31  
32  
33 34 Bennett K, Olatosi B, Probst J. Health Disparities: A Rural-Urban Chartbook. Carolina Rural  
34 Health Research Center, 2008; Accessed January 9, 2013 from  
35 [http://rhr.sph.sc.edu/report\\_by\\_topic.html#1-09](http://rhr.sph.sc.edu/report_by_topic.html#1-09).  
36  
37  
38 35 Hobbs F, Stoops N. Demographic Trends in the 20th Century: Census 2000 Special Reports.  
39 US Census Bureau, 2002; Accessed January 9, 2013 from  
40 <http://www.census.gov/prod/2002pubs/censr-4.pdf>.  
41  
42  
43 36 Lorence D, Chen L. Disparities in health information quality across the rural-urban  
44 continuum: where is coded data more reliable? *J Med Syst* 2008;**32**(1):1-8.  
45  
46 37 Berdahl TA, Kirby JB, Stone RA. Access to health care for nonmetro and metro Latinos of  
47 Mexican origin in the United States. *Med Care* 2007;**45**(7):647-54.  
48  
49 38 Hilty DM, Nesbitt TS, Kuenneth CA, Cruz GM, Hales RE. Rural versus suburban primary  
50 care needs, utilization, and satisfaction with telepsychiatric consultation. *J Rural Health*  
51 2007;**23**(2):163-5.  
52  
53  
54 39 Roland M, Guthrie B, Thomé DC. Primary medical care in the United Kingdom. *J Am Board*  
55 *Fam Med* 2012;**25**(S1):S6-11.  
56  
57  
58  
59  
60

1  
2  
3 40 Shi L, Singh D. Major Characteristics of U.S. Health Care Delivery. In: *Essentials of the U.S.*  
4 *Health Care System*. Sudbury, MA: Jones and Bartlett Publishers; 2010. p. 1-25.  
5  
6  
7  
8  
9  
10  
11  
12  
13  
14  
15  
16  
17  
18  
19  
20  
21  
22  
23  
24  
25  
26  
27  
28  
29  
30  
31  
32  
33  
34  
35  
36  
37  
38  
39  
40  
41  
42  
43  
44  
45  
46  
47  
48  
49  
50  
51  
52  
53  
54  
55  
56  
57  
58  
59  
60

For peer review only



**Comparison of health confidence in rural, suburban, and urban areas in the United Kingdom and the United States: A secondary analysis**

|                                 |                                                                                                                                                                                                                                                                                                                                           |
|---------------------------------|-------------------------------------------------------------------------------------------------------------------------------------------------------------------------------------------------------------------------------------------------------------------------------------------------------------------------------------------|
| Journal:                        | <i>BMJ Open</i>                                                                                                                                                                                                                                                                                                                           |
| Manuscript ID:                  | bmjopen-2013-002640.R2                                                                                                                                                                                                                                                                                                                    |
| Article Type:                   | Research                                                                                                                                                                                                                                                                                                                                  |
| Date Submitted by the Author:   | 03-Apr-2013                                                                                                                                                                                                                                                                                                                               |
| Complete List of Authors:       | Haven, Kristen; University of Arizona, Mel and Enid Zuckerman College of Public Health<br>Celaya, Martín; University of Arizona, Mel and Enid Zuckerman College of Public Health<br>Pierson, Jaclyn; Nyaya Health, Data and Research<br>Weisskopf, Aron; Mercer Human Resource Consulting,<br>MacKinnon, Neil; The University of Arizona, |
| <b>Primary Subject Heading</b>: | Patient-centred medicine                                                                                                                                                                                                                                                                                                                  |
| Secondary Subject Heading:      | Health policy, Health services research, Public health                                                                                                                                                                                                                                                                                    |
| Keywords:                       | Health policy < HEALTH SERVICES ADMINISTRATION & MANAGEMENT, HEALTH SERVICES ADMINISTRATION & MANAGEMENT, Quality in health care < HEALTH SERVICES ADMINISTRATION & MANAGEMENT, Organisation of health services < HEALTH SERVICES ADMINISTRATION & MANAGEMENT, PUBLIC HEALTH                                                              |
|                                 |                                                                                                                                                                                                                                                                                                                                           |

SCHOLARONE™  
Manuscripts

1  
2  
3 **TITLE:** Comparison of health confidence in rural, suburban, and urban areas in the United  
4 Kingdom and the United States: A secondary analysis  
5

6  
7 **SHORT TITLE:** Comparison of health confidence in the United Kingdom and the United States  
8

9 **CORRESPONDING AUTHOR:**

10 Kristen Haven, MA  
11 Mel and Enid Zuckerman College of Public Health  
12 Drachman Hall  
13 The University of Arizona  
14 Tucson, AZ 85721  
15 USA  
16 haven@email.arizona.edu  
17 (520) 834-3402  
18  
19

20  
21 **CO-AUTHORS:**

22 Martín F. Celaya, MPH  
23 Research Specialist  
24 Mel and Enid Zuckerman College of Public Health  
25 The University of Arizona  
26 Tucson, AZ 85721  
27 USA  
28  
29

30 Jaelyn Pierson, MPH, CPH  
31 Director of Data and Research  
32 Nyaya Health  
33 Achham District, Nepal  
34 and 17 West 17th St., 7th Floor  
35 New York, NY 10011  
36 USA  
37  
38

39 Aron J. Weisskopf, MPH  
40 Government Pharmacy Consulting Analyst  
41 Mercer Human Resource Consulting  
42 3131 East Camelback Road  
43 Phoenix, AZ 85016  
44 USA  
45  
46

47  
48 Neil J. MacKinnon, BSc (Pharm), MSc (Pharm), PhD  
49 Professor & The Walter H Pearce Endowed Chair  
50 Director, Center for Rural Health  
51 Mel and Enid Zuckerman College of Public Health  
52 The University of Arizona  
53 Tucson, AZ 85721  
54 USA  
55  
56  
57  
58  
59  
60

**KEYWORDS:**

Confidence  
Health policy  
Healthcare quality  
Patient-centered care  
Patient satisfaction  
Rural  
Urban

**WORD COUNT:** 3,078**ARTICLE SUMMARY**

## 1) Article Focus

- This paper compares consumers' self-reported confidence in healthcare in the United Kingdom and the United States, using 2010 survey responses gathered by the Commonwealth Fund.
- We sought to determine whether self-reported confidence in healthcare differed between the United Kingdom and the United States, as well as by rurality or urbanicity.

## 2) Key Messages

- We believe that while much current political and academic discourse surrounding healthcare is focused on systems, providers, and policy, patient experience and perception may also be key to understanding and responding to healthcare issues.
- Suburban residents in the US expressed higher confidence in both receiving effective treatment and affording care than their rural and urban counterparts; however, overall confidence in the US was significantly lower than in the UK, where residence type did not have an effect.
- These findings warrant examination of the causes for relative confidence levels in both regions, as well as among residence types within the US. Suburban healthcare in the US should be further examined to identify why it is associated with higher patient confidence levels.

## 3) Strengths and Limitations

*Strengths:*

- Confidence can serve as a useful proxy for understanding patient attitudes and behaviours and has implications distinct from other more commonly discussed notions such as satisfaction, trust, and self-efficacy.
- This analysis contributes to an ongoing discourse about healthcare systems by calling attention to the role of patient perspectives in this conversation. Such data provide a potential gauge of public response to policies affecting healthcare.

*Limitations:*

- Confidence is a subjective concept, and interpretations of the concept of confidence in one group may not be generalizable to another for semantic, cultural, and situational reasons.
- Similarly, the definition of "rurality" is not fixed, especially when comparing rural areas across different countries.



**ABSTRACT:**

**Objective:** Confidence in healthcare may influence patients' utilization of healthcare resources and perceptions of healthcare quality. We sought to determine whether self-reported confidence in healthcare differed between the United Kingdom and the United States, as well as by rurality or urbanicity.

**Design:** A secondary analysis of a subset of survey questions regarding self-reported confidence in healthcare from the 2010 Commonwealth Fund International Health Policy Survey.

**Setting:** Telephone survey of participants from the United Kingdom and the United States.

**Participants:** Our final analysis included 1,511 UK residents (688 rural, 446 suburban, 372 urban) and 2,501 US residents (536 rural, 1,294 suburban, 671 urban).

**Outcome measures:** Questions assessed respondents' confidence in the effectiveness and affordability of treatment. We compared survey outcomes from these questions between, and within, the two regions and among, and within, residence types (rural, suburban, and urban).

**Results:** Significant differences were found in self-reported confidence in healthcare between the UK and US, among residence types, and between the two regions within residence types. Reported levels were higher in the UK. Within regions, significant differences by residence type were found for the US but not the UK. Within the US, suburban respondents had the highest self-reported confidence in healthcare.

**Conclusions:** Significant differences exist between the UK and US in confidence in healthcare. In the US, but not in the UK, self-reported confidence is related to residence type. Within countries, significant differences by residence type were found for the US but not the UK. Our findings warrant examination of causes for relative confidence levels between regions and among US residence types.

## INTRODUCTION:

A focus on patient-centered care has emerged in recent years in discussions of healthcare delivery, systems of care, and direct care settings.[1, 2] Patient-centered care is typically defined as care that is responsive to individual patient needs and which facilitates shared decision making among patients, family members, and providers.[3] The patient experience is highly subjective and hinges on emotional, circumstantial, and interpretive factors that are difficult to quantify and compare across groups.

While patient satisfaction has been discussed at some length, [4, 5] another subjective measure, the concept of patient confidence in healthcare, is one that has been understudied thus far. The question of provider confidence in patients' abilities to care for themselves has been studied, but this research did not look into patients' own confidence regarding their health and healthcare.[6] A survey conducted in the United States (US) explored the public's confidence in affording and accessing care.[7] Another US survey measured respondents' confidence in their ability to overcome disease without medical assistance.[8] Consumer confidence in healthcare has been surveyed,[9] but this is a facet of confidence focused more narrowly on consumer spending.

Related issues like patient satisfaction and self-efficacy have been explored in depth,[4, 5, 10, 11] but these notions are distinct from confidence. Albert Bandura, who posited the widely held theory of self-efficacy as contributing to behaviours,[12] describes confidence as less conceptual than self-efficacy; confidence is a more generalized "strength of belief" but without the specificity to agency and capacity implied by self-efficacy.[13] Confidence has also been described as one component, along with skills and knowledge, that is necessary for a patient to be "activated" to participate in self-care or to make decisions with healthcare providers.[14] Self-efficacy is related to personal sense of capacity/capability, while satisfaction is a response or impression following an experience.[15]

With the passage and implementation of the Patient Protection and Affordable Care Act in the US, discussions about healthcare have dominated recent political and popular discourse.[16, 17] While the focus often centers around fiscal, cultural, and ethical concerns, the tendency to criticize or praise a healthcare system may also be linked to biases, generalizations, and narratives based on personal experiences and beliefs.[18, 19] Confidence in one's individual healthcare and in the health system may play a key role in shaping patients' utilization, assessments, and stated desires regarding their health. Single-payer, publicly administered healthcare in the United Kingdom (UK) is often held up as a counterpoint to the more fragmented multi-payer, fee-for-service system in the US;[20-22] thus a comparison of patient confidence in these two regions could be helpful in better assessing the role of confidence in discussions and decisions pertaining to healthcare.

The UK has been found to have one of the highest levels of patient satisfaction among European countries,[23] and comparisons of health outcomes in the UK and US have explored physical and mental domains of health-related quality of life in the two regions.[24] US-based confidence surveys have explored perceptions and comprehension of health reform[7] and consumer confidence within the US.[15] Building on this research and on public interest in co-examining the UK and US systems, we see value in comparing the two regions on the subjective measure of confidence.

1  
2  
3 Some factors related to confidence in healthcare include patient satisfaction, medical skepticism,  
4 trust in government, health literacy, and management and organization of the healthcare  
5 system.[24-27] The efficiency and effectiveness of a healthcare system from a patient's  
6 perspective might affect patient adherence to medical therapies, self-efficacy, and determination  
7 to improve personal health.[28] In the case of medical skepticism, mistrust in the healthcare  
8 system could result in a patient's complete denial of any sort of service, believing that she or he  
9 is capable of taking care of their own health with no assistance.[24] Personal characteristics that  
10 have been found to influence confidence in personal health management are disease status, age,  
11 insurance coverage/ability to pay, the present health service infrastructure, language and cultural  
12 barriers, ethnicity, sex/gender, employment status, and socioeconomic position.[8] These factors  
13 may affect a health system's delivery of programs and services if community members do not  
14 feel confident in the system's ability to address issues specific to their community. Rural, lower  
15 resource communities with poorer system performance have been associated with low patient  
16 satisfaction,[29] and a Canadian study found that place of residence contributed to patient  
17 satisfaction.[30] Factors such as perceived or actual facility or system performance and residence  
18 type may influence patient confidence in healthcare.

19  
20 We sought to determine whether self-reported confidence in healthcare differed between the  
21 United Kingdom and the United States, as well as by rurality or urbanicity.

## 22 23 **METHODS:**

24  
25  
26  
27  
28 Between March and June of 2010, the Commonwealth Fund's International Health Policy  
29 Survey was conducted via telephone surveys in 11 countries and from which we used data from  
30 the United Kingdom and the United States.[31] The survey was conducted by Harris Interactive  
31 Inc. for the Commonwealth Fund. The survey contained questions about health and healthcare  
32 experiences, perceptions, coverage, and costs. Households in both the UK and the US were  
33 selected using random digit dialing, and both samples were drawn to be representative of the  
34 geographic population distribution in each country or region.[31] Alaska and Hawaii were  
35 excluded from the US survey. For the UK, interviewing took place throughout the UK (i.e.,  
36 England, Scotland, Wales, and Northern Ireland). In both countries, respondent selection within  
37 the household was random, based on the "most recent birthday" method. In the UK, a web-  
38 based computer assisted telephone interviewing (web-based CATI) was used, while in the US,  
39 traditional CATI was used. Both forms of CATI are essentially the same, except that the web-  
40 based CATI program can be run off of Harris Interactive's own centrally-located server. In the  
41 UK, the surveys were conducted in English and averaged 20 minutes in length, while for the US,  
42 the surveys were conducted in English and Spanish and averaged 18 minutes in length. In both  
43 countries, professional interviewing staff conducted the interviewing and quality was  
44 continuously monitored by the supervisory staff. Collection methods are further described  
45 elsewhere.[31] The Commonwealth Fund granted permission for secondary analysis of this  
46 dataset.

47  
48  
49  
50  
51 For this analysis, residence categorization data from the UK was recoded from four categories  
52 into three categories for side-by-side comparison with the US. American respondents were  
53 categorized as living in either a rural, suburban, or urban area. UK respondents were originally  
54 categorized as living in a village/rural area, a small town, a large town or suburb of a city, or an  
55 urban area. Village/rural area and small town were combined into one "rural" group.

Three questions in the survey sought to assess participants' confidence levels. These questions were: 1. "How confident are you that if you become seriously ill, you will receive the most effective treatment, including drugs and diagnostic tests?" 2. "How confident are you that if you become seriously ill, you will be able to afford the care you need?" and 3. How confident are you that you can control and manage your health problems?" Responses to all three questions were measured on a six-item Likert scale with the items "very confident," "confident," "not very confident," "not at all confident," "unsure," and "decline to answer."

Pearson's chi-square tests were used to compare relative frequencies between and within regions and between and within residence types. To compare data ordinally, rank sum tests were also conducted. Mann-Whitney U tests measured differences between the UK and US overall, as well as between the UK and US within each residence type. Kruskal-Wallis tests were used for rank-sum comparisons between residence types overall and between residence types within each region or country. Significance was set at  $p \leq 0.05$ . All statistical analyses were conducted using Stata, Version 12 (StataCorp. 2011. Stata Statistical Software: Release 12. College Station, TX: StataCorp LP).

## RESULTS:

### Participants:

One thousand, five hundred and eleven (1,511) UK residents and 2,501 US residents responded to the survey. The UK response rate was 24%, and the US response rate was 26%. [16] Eighty-seven percent (86.8%) of UK and 77.0% of US respondents identified as white. Women made up 48.4% of the UK sample and 61.7% of the US respondents. Forty-six percent (45.5%) of UK respondents lived in rural areas or small towns. Only 21.4% of US respondents identified their residence as rural, while over half (51.7%) lived in suburban areas. Demographics are described further in Table 1. Data was missing for five UK respondents on residence type, so these five participants were excluded from the data analysis.

Table 1. Demographic Characteristics, by Region/Country of Residence and Residence Type

| Region/Country of Residence | United Kingdom          |          |       | United States |          |       |
|-----------------------------|-------------------------|----------|-------|---------------|----------|-------|
|                             | n=1511                  |          |       | n=2501        |          |       |
| Residence Type <sup>a</sup> | Rural/<br>Small<br>Town | Suburban | Urban | Rural         | Suburban | Urban |
| Age                         | 688                     | 446      | 372   | 536           | 1294     | 671   |
| 18-29                       | 215                     | 118      | 117   | 32            | 73       | 63    |
| 30-49                       | 235                     | 185      | 162   | 149           | 370      | 209   |
| 50-64                       | 131                     | 93       | 51    | 171           | 431      | 192   |
| 65+                         | 107                     | 50       | 42    | 184           | 420      | 207   |
| Gender                      |                         |          |       |               |          |       |
| Male                        | 358                     | 229      | 188   | 201           | 516      | 240   |
| Female                      | 330                     | 217      | 184   | 335           | 778      | 431   |
| Income Level <sup>b</sup>   |                         |          |       |               |          |       |

|                                                                                              |     |     |     |     |      |     |
|----------------------------------------------------------------------------------------------|-----|-----|-----|-----|------|-----|
| Much below average                                                                           | 26  | 6   | 17  | 106 | 196  | 130 |
| Somewhat below average                                                                       | 109 | 70  | 46  | 112 | 203  | 114 |
| Average                                                                                      | 345 | 234 | 171 | 139 | 262  | 154 |
| Somewhat above average                                                                       | 95  | 111 | 99  | 101 | 339  | 131 |
| Much above average                                                                           | 12  | 6   | 18  | 33  | 165  | 84  |
| Race/Ethnicity                                                                               |     |     |     |     |      |     |
| White, Non-Hispanic                                                                          |     |     |     | 450 | 1031 | 445 |
| Black, Non-Hispanic                                                                          |     |     |     | 33  | 59   | 83  |
| Hispanic                                                                                     |     |     |     | 26  | 96   | 73  |
| White (British, Irish, Other European)                                                       | 610 | 388 | 314 |     |      |     |
| Mixed (White and Black Caribbean, White and Black African, White and Asian, Any Other Mixed) | 54  | 36  | 31  |     |      |     |
| Asian or Asian British                                                                       | 10  | 8   | 14  |     |      |     |
| Black or Black British                                                                       | 8   | 14  | 9   |     |      |     |
| Chinese                                                                                      | 1   | 0   | 3   |     |      |     |
| Other                                                                                        | 2   | 0   | 1   |     |      |     |
| Decline to answer                                                                            | 3   | 0   | 0   |     |      |     |

<sup>a</sup>Missing data from 5 UK respondents on Residence Type

<sup>b</sup>Missing data from 141 UK and 232 US respondents on Income Level

### Outcomes:

A limited sample of respondents from each country (n=471 UK and 1,486 US) answered the question “How confident are you that you can control and manage your health problems?” Over 90% of this limited pool of respondents in both regions answered “very confident” or “confident,” so a statistical comparison was not meaningful, and that question was removed from the final analysis. Results of the other two confidence questions, “How confident are you that if you become seriously ill, you will receive the most effective treatment, including drugs and diagnostic tests?” and “How confident are you that if you become seriously ill, you will be able to afford the care you need?” are described as follows.

#### Confidence in receiving effective treatment:

Overall, the differences between the UK and the US for responses on confidence in receiving effective treatment were significant for both chi-square and Mann-Whitney U tests (Table 2).

Table 2. Survey responses to the question:

How confident are you that if you become seriously ill, you will receive the most effective treatment, including drugs and diagnostic tests?

|                                                 | Confidence Level (%) |           |                    |                      |          |                   | $\chi^2$ | Mann-Whitney U | Kruskal-Wallis |
|-------------------------------------------------|----------------------|-----------|--------------------|----------------------|----------|-------------------|----------|----------------|----------------|
|                                                 | Very confident       | Confident | Not very confident | Not at all confident | Not sure | Decline to answer |          |                |                |
| Comparison between Region/Country <sup>a</sup>  |                      |           |                    |                      |          |                   |          |                |                |
| United Kingdom                                  | 32.0%                | 61.3%     | 5.6%               | 0.7%                 | 0.4%     | 0.0%              | p<0.001* | p<0.001*       |                |
| United States                                   | 34.6%                | 38.7%     | 16.0%              | 9.1%                 | 1.3%     | 0.3%              |          |                |                |
| Comparison between Residence Types <sup>b</sup> |                      |           |                    |                      |          |                   |          |                |                |
|                                                 |                      |           |                    |                      |          |                   | p=0.004* |                | p=0.004*       |

|                                                                   |       |       |       |      |      |      |          |          |
|-------------------------------------------------------------------|-------|-------|-------|------|------|------|----------|----------|
| Rural                                                             | 32.0% | 51.2% | 10.2% | 5.2% | 1.2% | 0.1% |          |          |
| Suburban                                                          | 35.9% | 44.9% | 12.4% | 5.6% | 1.0% | 0.2% |          |          |
| Urban                                                             | 31.7% | 46.3% | 13.8% | 7.2% | 0.6% | 0.4% |          |          |
| Comparison within Residence Types, by Region/Country <sup>c</sup> |       |       |       |      |      |      |          |          |
| Rural                                                             |       |       |       |      |      |      | p<0.001* | p<0.001* |
| Suburban                                                          |       |       |       |      |      |      | p<0.001* | p=0.009* |
| Urban                                                             |       |       |       |      |      |      | p<0.001* | p<0.001* |
| Comparison within Region/Country, by Residence Types <sup>d</sup> |       |       |       |      |      |      |          |          |
| United Kingdom                                                    |       |       |       |      |      |      | p=0.817  | p=0.781  |
| United States                                                     |       |       |       |      |      |      | p=0.003* | p=0.001* |

<sup>a,c</sup>Chi-square and Mann-Whitney U tests

<sup>b,d</sup>Chi-square and Kruskal-Wallis tests

Ninety-three percent (93.3%) of UK residents were confident or very confident in receiving effective treatment, compared with 73.3% of US residents. Within residence types, Mann-Whitney and chi-square tests revealed statistically significant differences between countries (all  $p<0.01$ ). Among residence types overall, differences were also significant based on both chi-square and Kruskal-Wallis tests. Within each country, there were only statistically significant differences by residence type in the US ( $\chi^2$   $p=0.003$ , Kruskal-Wallis  $p=0.001$ ) and not in the UK ( $\chi^2$   $p=0.817$ , Kruskal-Wallis  $p=0.781$ ).

#### Confidence in affording care:

Statistically significant differences were found between the UK and US via chi-square and Mann-Whitney tests (Table 3).

Table 3. Survey responses to the question:

How confident are you that if you become seriously ill, you will be able to afford the care you need?

|                                                                   | Confidence Level (%) |           |                    |                      |          |                   | $\chi^2$ | Mann-Whitney U | Kruskal-Wallis |
|-------------------------------------------------------------------|----------------------|-----------|--------------------|----------------------|----------|-------------------|----------|----------------|----------------|
|                                                                   | Very confident       | Confident | Not very confident | Not at all confident | Not sure | Decline to answer |          |                |                |
| Comparison between Region/Country <sup>a</sup>                    |                      |           |                    |                      |          |                   |          |                |                |
| United Kingdom                                                    | 33.8%                | 57.2%     | 6.6%               | 0.6%                 | 1.9%     | 0.0%              | p<0.001* | p<0.001*       |                |
| United States                                                     | 26.6%                | 35.0%     | 22.4%              | 13.6%                | 2.1%     | 0.3%              |          |                |                |
| Comparison between Residence Types <sup>b</sup>                   |                      |           |                    |                      |          |                   |          |                |                |
| Rural                                                             | 27.5%                | 47.7%     | 15.4%              | 6.8%                 | 2.5%     | 0.1%              | p=0.002* |                | p=0.388        |
| Suburban                                                          | 30.7%                | 41.5%     | 17.1%              | 8.7%                 | 1.7%     | 0.3%              |          |                |                |
| Urban                                                             | 29.1%                | 41.4%     | 16.6%              | 11.0%                | 1.8%     | 0.1%              |          |                |                |
| Comparison within Residence Types, by Region/Country <sup>c</sup> |                      |           |                    |                      |          |                   |          |                |                |
| Rural                                                             |                      |           |                    |                      |          |                   | p<0.001* | p<0.001*       |                |
| Suburban                                                          |                      |           |                    |                      |          |                   | p<0.001* | p<0.001*       |                |
| Urban                                                             |                      |           |                    |                      |          |                   | p<0.001* | p<0.001*       |                |
| Comparison within Region/Country, by Residence Types <sup>d</sup> |                      |           |                    |                      |          |                   |          |                |                |
| United Kingdom                                                    |                      |           |                    |                      |          |                   | p=0.339  |                | p=0.084        |

United States

p=0.001\*

p=0.001\*

<sup>a,c</sup>Chi-square and Mann-Whitney U tests<sup>b,d</sup>Chi-square and Kruskal-Wallis tests

In the UK, 91% of respondents were confident or very confident in their ability to afford healthcare, versus 61.6% in the US. Within residence types there were also statistically significant differences. Among residence types overall, there were only statistically significant differences based the chi-square test, not on the Kruskal-Wallis. Within the UK and US, as for the effective treatment question, differences in confidence based on residence type were only statistically significant for US respondents (US:  $\chi^2$  p=0.001, Kruskal-Wallis p=0.001; UK  $\chi^2$  p=0.339, Kruskal-Wallis p=0.084).

A descriptive analysis of responses by residence type in the US revealed that suburban respondents had the highest percentage (76.3%) of confident or very confident ratings in effectiveness of treatment, versus 69.4% in rural areas and 70.4% in urban areas. Regarding ability to afford treatment in the US, 65.4% of suburban residents were confident or very confident, compared with 56.8% in rural areas and 58.2% in urban areas.

## DISCUSSION:

Significant differences were found between the UK and the US in health confidence. Suburban residents in the US expressed higher confidence in both receiving effective treatment and affording care than their rural and urban counterparts; however, overall confidence in the US was significantly lower than in the UK, where residence type did not have an effect. The effect of the overall difference between residence types may be moderated by the lack of difference in the UK. Our findings are supported by a previous study which found that in the UK the public is happier than in the US (and other countries surveyed) regarding their healthcare system and are least likely to be worried about future healthcare needs.[32] Higher confidence in healthcare in the UK than in the US may be related to differences between healthcare systems, to cultural and political differences, or to differing social norms that may influence interpretations in answering questions about confidence. Examining causes for higher or lower respondent confidence could illuminate future directions for health system decision makers in both regions.

In addition to exploring the causes for relative confidence levels in regions, these findings also warrant closer examination of the different confidence levels among residence types within the US. Lower confidence in the rural US may not be simply attributable to health insurance coverage, as rural US coverage is highly variable.[33] Other factors such as income, race/ethnicity, age, and socio-cultural factors may combine to influence rural confidence.[33] The larger percentage of suburban Americans who rated their confidence as high implies that factors in the suburban environment may contribute to a sense of control or reliability. While disparities in access, safety, and quality of care between rural and urban areas are well-documented,[34, 35] our findings suggest that exploring the suburban healthcare environment could provide insight into US healthcare attitudes, especially given that 50% of Americans live in suburban areas.[36] Studies have explored rural, suburban, and urban localities as factors in health information management,[37] minority access to care,[38] and telemedicine satisfaction[39] with varying results for each measure. More targeted research on place of residence in healthcare confidence and quality may be advisable.

1  
2  
3  
4  
5  
6  
7  
8  
9  
10  
11  
12  
13  
14  
15  
16  
17  
18  
19  
20  
21  
22  
23  
24  
25  
26  
27  
28  
29  
30  
31  
32  
33  
34  
35  
36  
37  
38  
39  
40  
41  
42  
43  
44  
45  
46  
47  
48  
49  
50  
51  
52  
53  
54  
55  
56  
57  
58  
59  
60

This analysis contributes to an ongoing discourse about the advantages and disadvantages of UK and US healthcare systems by calling attention to the role of patient perspectives in this conversation. How end users perceive their system to be serving them or accessible to them is an important factor in assessing, maintaining, and revising healthcare legislation, pricing, standards of care, and communication frameworks. Data on confidence, particularly in patient assessments of future or hypothetical health circumstances, provide insight into how patients might make decisions in planning and paying for healthcare. Such data also provide a potential gauge of public response to policies affecting healthcare. Our findings that UK residents have greater self-reported confidence in healthcare might suggest higher levels of perceived reliability and system stability in their single-payer system as well as a perspective of confidence as a social norm. The outcomes determined here may be viewed not only as markers of patients' personal experiences with healthcare, but also as indicators of the sociocultural context in which each healthcare system functions. Comparing responses to confidence questions with responses about insurance status, accessibility of care, and personal factors such as income and age could be an area for follow up research that could clarify the extent to which expressions of confidence might be associated with system features versus other factors.

There remain constraints and limitations on our data and subsequent conclusions that must be taken into consideration. We were limited by the variables available in a secondary dataset, and our use of secondary data was driven by empirical research questions rather than by a conceptual framework. This analysis of two countries is exploratory in nature, and further research would be needed to determine if our findings hold true in other countries.

We acknowledge the inability to assess wholly the concept of confidence. Bandura refers to confidence as nonspecific and a "catchword." [13] Confidence in one group may not be generalizable to another for semantic, cultural, and situational reasons. However, confidence is probably a more accessible term than "self-efficacy" or similar concepts for members of the public. As such, confidence may serve as a useful proxy in attempts to measure and understand patient attitudes and behaviours and has implications distinct from other commonly discussed notions such as satisfaction or trust, in that confidence implies components of self-efficacy. One study of diabetic patients in the US found a strong correlation between patient self-efficacy and confidence in health outcomes, underscoring these separately measured variables as related but distinct. [40] For both populations sampled in this study, data was gathered from primarily English-speaking respondents who answered survey questions about confidence originally written in English, and both groups received the questions worded identically, providing some consistency in how confidence might be interpreted here across groups.

The issue of confidence itself is somewhat unwieldy given the inherently subjective nature of the concept and the myriad factors that can contribute to individual confidence. Age, gender, ethnicity, education, socioeconomic status, health status, and health literacy are just a few of the many factors that can potentially contribute to confidence in healthcare, and each might also serve as a potential confounder. Notably, two of the three Commonwealth Fund questions involve notions of personal forecasting ("if I become seriously ill, then..."), which may be more subject to biases than questions about conditions that are already present.



1  
2  
3 The definition of “rurality” can be problematic, especially given the disparate categories for the  
4 UK and US. Although the recoding of these categories to combine “village/ rural area” and  
5 “small town” in the UK was rather simple, definitions of what constitutes rural, suburban, and  
6 other descriptors varies culturally and contextually. It is also notable that four healthcare systems  
7 are included in the Commonwealth Fund’s category for the UK. Scotland, Wales, Northern  
8 Ireland, and England each maintain unique healthcare systems, and despite their similarities,  
9 distinctions should be acknowledged when assigning value to UK health system effectiveness  
10 and quality in comparison with the US. For example, while universal registration for primary  
11 care is consistent across the four countries’ health systems, there are key differences in  
12 prescription charges from country to country and in how each country is implementing recent  
13 reforms.[41] In addition to considering these distinct countries in future comparisons, other  
14 healthcare systems such as Canada’s, which combines public funding with private sector  
15 delivery,[42] could provide a useful point of comparison for future analyses of confidence in  
16 healthcare.  
17  
18  
19

### 20 21 **CONCLUSION:**

22 Our analyses revealed significant differences between the UK and the US in self-reported  
23 confidence levels, suggesting a disparity between these regions and their systems in the provision  
24 of equitable healthcare to all residents. Suburban healthcare in the US should be further  
25 examined to identify why it is associated with higher patient confidence levels. The findings of  
26 this study build on existing literature and may provide insight for policy developers and health  
27 practitioners working with rural, suburban, and urban communities. Patient confidence would be  
28 an interesting and culturally relevant measure for future survey projects to explore in more detail.  
29  
30

### 31 **ACKNOWLEDGEMENTS:**

32 The authors wish to thank Cathy Schoen, Michelle Doty, Robin Osborn, David Squires, and  
33 Kristof Stremikis from the Commonwealth Fund for providing the data set and input on the final  
34 draft of this manuscript.  
35  
36

37 **COMPETING INTERESTS:** None to declare.  
38

39 **FUNDING:** None of the authors have an actual or potential financial or commercial conflict of  
40 interest with the information presented in this manuscript.  
41  
42

43 **DATA SHARING:** No additional data available.  
44

45 **STATEMENT OF ETHICS:** Ethics approval was not required for this study. The  
46 Commonwealth Fund granted permission for secondary analysis of the dataset used.  
47  
48

49 **CONTRIBUTORSHIP:** KH, MC, JP, AW, and NM conceived the study design. KH managed  
50 and analysed the data. KH, MC, JP, and AW participated in data interpretation and drafting  
51 the article. KH and NM were involved in revisions. All authors approved the final version.  
52  
53  
54  
55  
56  
57  
58  
59  
60

## REFERENCES

- 1  
2  
3  
4  
5  
6 1 Epstein RM, Street RL Jr. The values and value of patient-centered care. *Ann Fam Med* 2011;**9**(2):100-3.  
7  
8  
9 2 Snyder CF, Aaronson NK, Choucair AK, et al. Implementing patient-reported outcomes  
10 assessment in clinical practice: a review of the options and considerations. *Qual Life Res* 2012:  
11 **21**(8):1305-14.  
12  
13  
14 3 Rathert C, Wyrwich MD, Boren SA. Patient-centered care and outcomes: a systematic review  
15 of the literature. *Med Care Res Rev* Published Online First: 20 November 2012.  
16 doi:10.1177/1077558712465774.  
17  
18  
19 4 Aiken LH, Sermeus W, Van den Heede K, et al. Patient safety, satisfaction, and quality of  
20 hospital care: cross sectional surveys of nurses and patients in 12 countries in Europe and the  
21 United States. *BMJ* 2012;Mar 20(344:e1717) doi:10.1136/bmj.e1717.  
22  
23  
24 5 Campbell SM, Kontopantelis E, Reeves D, et al. Changes in patient experiences of primary  
25 care during health service reforms in England between 2003 and 2007. *Ann Fam Med* 2010;  
26 **8**(6):499-506.  
27  
28  
29 6 Brooks-Carthon JM, Kutney-Lee A, Sloane DM, et al. Quality of care and patient satisfaction  
30 in hospitals with high concentrations of black patients. *J Nurs Scholarsh* 2011; **43**(3):301-310.  
31  
32  
33 7 Employee Benefit Research Institute. Health Confidence Survey: Most Americans Unfamiliar  
34 With Key Aspects of Health Reform. *EBRI Notes* 2011;**32**(9):1-22.  
35  
36  
37 8 Borders TF, Lensing S, Xu KT. Health confidence and racial and ethnic disparities in  
38 consumers' assessments of health care. *Am J Med Qual* 2011;**26**(3):220-8.  
39  
40  
41 9 Robert Wood Johnson Foundation. RWJF Health Care Consumer Confidence Index: July  
42 2009; Accessed January 9, 2013 from <http://www.rwjf.org/healthpolicy/product.jsp?id=47328>.  
43  
44  
45 10 Tataw DB, Bazargan-Hejazi S, James FW. Health services utilization, satisfaction, and  
46 attachment to a regular source of care among participants in an urban health provider alliance. *J*  
47 *Health Hum Serv Adm* 2011;**34**(1):109-41.  
48  
49  
50 11 Frei A, Svarin A, Steurer-Stey C, Puhan MA. Self-efficacy instruments for patients with  
51 chronic diseases suffer from methodological limitations--a systematic review. *Health Qual Life*  
52 *Outcomes* 2009;**7**:86  
53  
54  
55 12 Bandura A, Adams NE, Beyer J. Cognitive processes mediating behavioral change. *J Pers*  
56 *Soc Psychol* 1977;**35**(3):125-39.  
57  
58  
59 13 Bandura A. *Self-efficacy: The exercise of control*. New York: Worth Publishers, 1997.  
60

1  
2  
3 14 Wallston KA. Patient health care behaviours related to medication use and adherence. In:  
4 MacKinnon NJ, ed. *Safe and effective. The eight essential elements of an optimal medication-use*  
5 *system*. Ottawa, ON: Canadian Pharmacists Association, 2007.  
6

7  
8 15 American Medical Association [Internet]. Patient Satisfaction/Experience. Accessed March  
9 12, 2013 from [http://www.ama-assn.org/ama/pub/physician-resources/practice-management-](http://www.ama-assn.org/ama/pub/physician-resources/practice-management-center/practice-operations/patient-satisfaction-experience.page)  
10 [center/practice-operations/patient-satisfaction-experience.page](http://www.ama-assn.org/ama/pub/physician-resources/practice-management-center/practice-operations/patient-satisfaction-experience.page).  
11

12  
13 16 The New York Times [Internet]. Times Topics: Health Care Reform. Accessed March 12,  
14 2013 from  
15 [http://topics.nytimes.com/top/news/health/diseasesconditionsandhealthtopics/health\\_insurance\\_a](http://topics.nytimes.com/top/news/health/diseasesconditionsandhealthtopics/health_insurance_and_managed_care/health_care_reform/index.html)  
16 [nd\\_managed\\_care/health\\_care\\_reform/index.html](http://topics.nytimes.com/top/news/health/diseasesconditionsandhealthtopics/health_insurance_and_managed_care/health_care_reform/index.html).  
17

18  
19 17 The Wall Street Journal [Internet]. Topics: Health Reform. Accessed March 12, 2013 from  
20 <http://topics.wsj.com/subject/H/health-reform/1662>.  
21

22  
23 18 Rosenstock IM. Why people use health services. *Milbank Mem Fund Q* 1966;**44**(3):94-127.  
24

25  
26 19 Soroka S, Maioni A, Martin P. What moves public opinion on health care? Individual  
27 experiences, system performance, and media framing. *J Health Polit Polic Law*. Forthcoming  
28 2013. Accessed March 12, 2013 from  
29 [http://www.snsoroka.com/files/WhatMovesPO\\_JHPPL.pdf](http://www.snsoroka.com/files/WhatMovesPO_JHPPL.pdf).  
30

31  
32 20 Franco OH, Wong YL, Kandala NB, et al. Cross-cultural comparison of correlates of quality  
33 of life and health status: the Whitehall II Study (UK) and the Western New York Health Study  
34 (US). *Eur J Epidemiol* 2012;**27**(4):255-65.  
35

36  
37 21 Light D. Universal health care: Lessons from the British experience. *Am J Public Health*  
38 2003;**93**(1):25-30.  
39

40  
41 22 Banks J, Marmot M, Oldfield Z, Smith JP. Disease and disadvantage in the United States and  
42 in England. *JAMA* 2006;**295**(17):2037-45.  
43

44  
45 23 Coulter A, Jenkinson C. European patients' views on the responsiveness of health systems and  
46 healthcare providers. *Eur J Public Health* 2005;**15**(4):355-60.  
47

48  
49 24 Rohrer JE, Borders TF. Healthy skepticism. *Adv Prev Med* 2004;**39**(6):1234-7.  
50

51  
52 25 Calnan MW, Sanford E. Public trust in health care: the system or the doctor? *Qual Saf Health*  
53 *Care* 2004;**13**(2):92-7.  
54

55  
56 26 Hesse BW, Nelson DE, Kreps GL, et al. Trust and sources of health information: the impact  
57 of the Internet and its implications for health care providers: findings from the first Health  
58 Information National Trends Survey. *Arch Intern Med* 2005;**165**(22):2618.  
59  
60

- 1  
2  
3 27 Rockers PC, Kruk ME, Laugesen MJ. Perceptions of the health system and public trust in  
4 government in low-and middle-income countries: evidence from the World Health Surveys. *J*  
5 *Health Polit Policy Law* 2012;**37**(3):405-37.  
6  
7  
8 28 Delamater AM. Improving patient adherence. *Clin Diabetes* 2006;**24**(2):71-7.  
9  
10 29 Girotra S, Cram P, Popescu I. Patient satisfaction at America's lowest performing hospitals.  
11 *Circ Cardiovasc Qual Outcomes* 2012;**5**(3):365-72.  
12  
13  
14 30 Levinton C, Veillard J, Slutsky A, Brown A. The importance of place of residence in patient  
15 satisfaction. *Int J Qual Health Care* 2011;**23**(5):495-502.  
16  
17  
18 31 Schoen C, Osborn R, Squires D, et al. How health insurance design affects access to care and  
19 costs, by income, in eleven countries. *Health Aff* 2010;**29**(12):2323-34.  
20  
21 32 Donelan K, Blendon RJ, Schoen C, et al. The cost of health system change: public discontent  
22 in five nations. *Health Aff* 1999;**18**(3):206-16.  
23  
24  
25 33 Kaiser Family Foundation [Internet]. Kaiser Commission on Medicaid and the Uninsured.  
26 Health Insurance Coverage in Rural America. 2003. Accessed March 12, 2013 from  
27 <http://www.kff.org/uninsured/upload/Health-Insurance-Coverage-in-Rural-America-PDF.pdf>.  
28  
29  
30 34 Ryan K, Rahman A. Examining factors influencing patient satisfaction with nurse  
31 practitioners in rural urgent care centers. *J Am Acad Nurse Pract* 2012;**24**(2):77-81.  
32  
33 35 Bennett K, Olatosi B, Probst J. Health Disparities: A Rural-Urban Chartbook. Carolina Rural  
34 Health Research Center, 2008; Accessed January 9, 2013 from  
35 [http://rhr.sph.sc.edu/report\\_by\\_topic.html#1-09](http://rhr.sph.sc.edu/report_by_topic.html#1-09).  
36  
37  
38 36 Hobbs F, Stoops N. Demographic Trends in the 20th Century: Census 2000 Special Reports.  
39 US Census Bureau, 2002; Accessed January 9, 2013 from  
40 <http://www.census.gov/prod/2002pubs/censr-4.pdf>.  
41  
42  
43 37 Lorence D, Chen L. Disparities in health information quality across the rural-urban  
44 continuum: where is coded data more reliable? *J Med Syst* 2008;**32**(1):1-8.  
45  
46 38 Berdahl TA, Kirby JB, Stone RA. Access to health care for nonmetro and metro Latinos of  
47 Mexican origin in the United States. *Med Care* 2007;**45**(7):647-54.  
48  
49  
50 39 Hilty DM, Nesbitt TS, Kuenneth CA, et al. Rural versus suburban primary care needs,  
51 utilization, and satisfaction with telepsychiatric consultation. *J Rural Health* 2007;**23**(2):163-5.  
52  
53  
54 40 Skelly AH, Marshall JR, Haughey BP, et al. Self-efficacy and confidence in outcomes as  
55 determinants of self-care practices in inner-city, African-American women with non-insulin-  
56 dependent diabetes. *Diabetes Educ* 1995;**21**(1):38-46.  
57  
58  
59  
60

1  
2  
3 41 Roland M, Guthrie B, Thomé DC. Primary medical care in the United Kingdom. *J Am Board*  
4 *Fam Med* 2012;**25**(S1):S6-11.  
5  
6

7 42 Shi L, Singh D. Major Characteristics of U.S. Health Care Delivery. In: *Essentials of the U.S.*  
8 *Health Care System*. Sudbury, MA: Jones and Bartlett Publishers; 2010. p. 1-25.  
9  
10  
11  
12  
13  
14  
15  
16  
17  
18  
19  
20  
21  
22  
23  
24  
25  
26  
27  
28  
29  
30  
31  
32  
33  
34  
35  
36  
37  
38  
39  
40  
41  
42  
43  
44  
45  
46  
47  
48  
49  
50  
51  
52  
53  
54  
55  
56  
57  
58  
59  
60

For peer review only

1  
2  
3 **TITLE:** Comparison of health confidence in rural, suburban, and urban areas in the United  
4 Kingdom and the United States: A secondary analysis  
5

6  
7 **SHORT TITLE:** Comparison of health confidence in the United Kingdom and the United States  
8

9 **CORRESPONDING AUTHOR:**

10 Kristen Haven, MA  
11 Mel and Enid Zuckerman College of Public Health  
12 Drachman Hall  
13 The University of Arizona  
14 Tucson, AZ 85721  
15 USA  
16 haven@email.arizona.edu  
17 (520) 834-3402  
18  
19

20  
21 **CO-AUTHORS:**

22 Martín F. Celaya, MPH  
23 Research Specialist  
24 Mel and Enid Zuckerman College of Public Health  
25 The University of Arizona  
26 Tucson, AZ 85721  
27 USA  
28

29  
30 Jaelyn Pierson, MPH, CPH  
31 Director of Data and Research  
32 Nyaya Health  
33 Achham District, Nepal  
34 and 17 West 17th St., 7th Floor  
35 New York, NY 10011  
36 USA  
37

38  
39 Aron J. Weisskopf, MPH  
40 Government Pharmacy Consulting Analyst  
41 Mercer Human Resource Consulting  
42 3131 East Camelback Road  
43 Phoenix, AZ 85016  
44 USA  
45

46  
47  
48 Neil J. MacKinnon, BSc (Pharm), MSc (Pharm), PhD  
49 Professor & The Walter H Pearce Endowed Chair  
50 Director, Center for Rural Health  
51 Mel and Enid Zuckerman College of Public Health  
52 The University of Arizona  
53 Tucson, AZ 85721  
54 USA  
55  
56  
57  
58  
59  
60

**KEYWORDS:**

Confidence  
Health policy  
Healthcare quality  
Patient-centered care  
Patient satisfaction  
Rural  
Urban

**WORD COUNT:** 3,078**ARTICLE SUMMARY**

## 1) Article Focus

- This paper compares consumers' self-reported confidence in healthcare in the United Kingdom and the United States, using 2010 survey responses gathered by the Commonwealth Fund.
- We sought to determine whether self-reported confidence in healthcare differed between the United Kingdom and the United States, as well as by rurality or urbanicity.

## 2) Key Messages

- We believe that while much current political and academic discourse surrounding healthcare is focused on systems, providers, and policy, patient experience and perception may also be key to understanding and responding to healthcare issues.
- Suburban residents in the US expressed higher confidence in both receiving effective treatment and affording care than their rural and urban counterparts; however, overall confidence in the US was significantly lower than in the UK, where residence type did not have an effect.
- These findings warrant examination of the causes for relative confidence levels in both regions, as well as among residence types within the US. Suburban healthcare in the US should be further examined to identify why it is associated with higher patient confidence levels.

## 3) Strengths and Limitations

*Strengths:*

- Confidence can serve as a useful proxy for understanding patient attitudes and behaviours and has implications distinct from other more commonly discussed notions such as satisfaction, trust, and self-efficacy.
- This analysis contributes to an ongoing discourse about healthcare systems by calling attention to the role of patient perspectives in this conversation. Such data provide a potential gauge of public response to policies affecting healthcare.

*Limitations:*

- Confidence is a subjective concept, and interpretations of the concept of confidence in one group may not be generalizable to another for semantic, cultural, and situational reasons.
- Similarly, the definition of "rurality" is not fixed, especially when comparing rural areas across different countries.

**ABSTRACT:**

**Objective:** Confidence in healthcare may influence patients' utilization of healthcare resources and perceptions of healthcare quality. We sought to determine whether self-reported confidence in healthcare differed between the United Kingdom and the United States, as well as by rurality or urbanicity.

**Design:** A secondary analysis of a subset of survey questions regarding self-reported confidence in healthcare from the 2010 Commonwealth Fund International Health Policy Survey.

**Setting:** Telephone survey of participants from the United Kingdom and the United States.

**Participants:** Our final analysis included 1,511 UK residents (688 rural, 446 suburban, 372 urban) and 2,501 US residents (536 rural, 1,294 suburban, 671 urban).

**Outcome measures:** Questions assessed respondents' confidence in the effectiveness and affordability of treatment. We compared survey outcomes from these questions between, and within, the two regions and among, and within, residence types (rural, suburban, and urban).

**Results:** Significant differences were found in self-reported confidence in healthcare between the UK and US, among residence types, and between the two regions within residence types. Reported levels were higher in the UK. Within regions, significant differences by residence type were found for the US but not the UK. Within the US, suburban respondents had the highest self-reported confidence in healthcare.

**Conclusions:** Significant differences exist between the UK and US in confidence in healthcare. In the US, but not in the UK, self-reported confidence is related to residence type. Within countries, significant differences by residence type were found for the US but not the UK. Our findings warrant examination of causes for relative confidence levels between regions and among US residence types.



## INTRODUCTION:

A focus on patient-centered care has emerged in recent years in discussions of healthcare delivery, systems of care, and direct care settings.[1, 2] Patient-centered care is typically defined as care that is responsive to individual patient needs and which facilitates shared decision making among patients, family members, and providers.[3] The patient experience is highly subjective and hinges on emotional, circumstantial, and interpretive factors that are difficult to quantify and compare across groups.

While patient satisfaction has been discussed at some length, [4, 5] another subjective measure, the concept of patient confidence in healthcare, is one that has been understudied thus far. The question of provider confidence in patients' abilities to care for themselves has been studied, but this research did not look into patients' own confidence regarding their health and healthcare.[6] A survey conducted in the United States (US) explored the public's confidence in affording and accessing care.[7] Another US survey measured respondents' confidence in their ability to overcome disease without medical assistance.[8] Consumer confidence in healthcare has been surveyed,[9] but this is a facet of confidence focused more narrowly on consumer spending.

Related issues like patient satisfaction and self-efficacy have been explored in depth,[4, 5, 10, 11] but these notions are distinct from confidence. [Albert Bandura, who posited the widely held theory of self-efficacy as contributing to behaviours,\[12\] describes confidence as less conceptual than self-efficacy; confidence is a more generalized "strength of belief" but without the specificity to agency and capacity implied by self-efficacy.\[13\] Confidence has also been described as one component, along with skills and knowledge, that is necessary for a patient to be "activated" to participate in self-care or to make decisions with healthcare providers.\[14\] Self-efficacy is related to personal sense of capacity/capability, while satisfaction is a response or impression following an experience.\[15\]](#)

With the passage and implementation of the Patient Protection and Affordable Care Act in the US, discussions about healthcare have dominated recent political and popular discourse.[16, 17] While the focus often centers around fiscal, cultural, and ethical concerns, the tendency to criticize or praise a healthcare system may also be linked to biases, generalizations, and narratives based on personal experiences and beliefs.[18, 19] Confidence in one's individual healthcare and in the health system may play a key role in shaping patients' utilization, assessments, and stated desires regarding their health. Single-payer, publicly administered healthcare in the United Kingdom (UK) is often held up as a counterpoint to the more fragmented multi-payer, fee-for-service system in the US;[20-22] thus a comparison of patient confidence in these two regions could be helpful in better assessing the role of confidence in discussions and decisions pertaining to healthcare.

The UK has been found to have one of the highest levels of patient satisfaction among European countries,[23] and comparisons of health outcomes in the UK and US have explored physical and mental domains of health-related quality of life in the two regions.[24] US-based confidence surveys have explored perceptions and comprehension of health reform[7] and consumer confidence within the US.[15] Building on this research and on public interest in co-examining the UK and US systems, we see value in comparing the two regions on the subjective measure of confidence.

1  
2  
3 Some factors related to confidence in healthcare include patient satisfaction, medical skepticism,  
4 trust in government, health literacy, and management and organization of the healthcare  
5 system.[24-27] The efficiency and effectiveness of a healthcare system from a patient's  
6 perspective might affect patient adherence to medical therapies, self-efficacy, and determination  
7 to improve personal health.[28] In the case of medical skepticism, mistrust in the healthcare  
8 system could result in a patient's complete denial of any sort of service, believing that she or he  
9 is capable of taking care of their own health with no assistance.[24] Personal characteristics that  
10 have been found to influence confidence in personal health management are disease status, age,  
11 insurance coverage/ability to pay, the present health service infrastructure, language and cultural  
12 barriers, ethnicity, sex/gender, employment status, and socioeconomic position.[8] These factors  
13 may affect a health system's delivery of programs and services if community members do not  
14 feel confident in the system's ability to address issues specific to their community. Rural, lower  
15 resource communities with poorer system performance have been associated with low patient  
16 satisfaction,[29] and a Canadian study found that place of residence contributed to patient  
17 satisfaction.[30] Factors such as perceived or actual facility or system performance and residence  
18 type may influence patient confidence in healthcare.

19  
20 We sought to determine whether self-reported confidence in healthcare differed between the  
21 United Kingdom and the United States, as well as by rurality or urbanicity.

## 22 23 24 25 26 27 **METHODS:**

28 Between March and June of 2010, the Commonwealth Fund's International Health Policy  
29 Survey was conducted via telephone surveys in 11 countries and from which we used data from  
30 the United Kingdom and the United States.[31] [The survey was conducted by Harris Interactive  
31 Inc. for the Commonwealth Fund.](#) The survey contained questions about health and healthcare  
32 experiences, perceptions, coverage, and costs. Households in both the UK and the US were  
33 selected using random digit dialing, and both samples were drawn to be representative of the  
34 geographic population distribution in each country or region.[31] Alaska and Hawaii were  
35 excluded from the US survey. [For the UK, interviewing took place throughout the UK \(i.e.,  
36 England, Scotland, Wales, and Northern Ireland\).](#) In both countries, respondent selection within  
37 the household was random, based on the "most recent birthday" method. In the UK, a web-  
38 based computer assisted telephone interviewing (web-based CATI) was used, while in the US,  
39 traditional CATI was used. Both forms of CATI are essentially the same, except that the web-  
40 based CATI program can be run off of Harris Interactive's own centrally-located server. In the  
41 UK, the surveys were conducted in English and averaged 20 minutes in length, while for the US,  
42 the surveys were conducted in English and Spanish and averaged 18 minutes in length. In both  
43 countries, professional interviewing staff conducted the interviewing and quality was  
44 continuously monitored by the supervisory staff. Collection methods are further described  
45 elsewhere.[31] [The Commonwealth Fund granted permission for secondary analysis of this  
46 dataset.](#)

47  
48 For this analysis, residence categorization data from the UK was recoded from four categories  
49 into three categories for side-by-side comparison with the US. American respondents were  
50 categorized as living in either a rural, suburban, or urban area. UK respondents were originally  
51 categorized as living in a village/rural area, a small town, a large town or suburb of a city, or an  
52 urban area. Village/rural area and small town were combined into one "rural" group.  
53  
54  
55  
56  
57  
58  
59  
60

Three questions in the survey sought to assess participants' confidence levels. These questions were: 1. "How confident are you that if you become seriously ill, you will receive the most effective treatment, including drugs and diagnostic tests?" 2. "How confident are you that if you become seriously ill, you will be able to afford the care you need?" and 3. How confident are you that you can control and manage your health problems?" Responses to all three questions were measured on a six-item Likert scale with the items "very confident," "confident," "not very confident," "not at all confident," "unsure," and "decline to answer."

Pearson's chi-square tests were used to compare relative frequencies between and within regions and between and within residence types. To compare data ordinally, rank sum tests were also conducted. Mann-Whitney U tests measured differences between the UK and US overall, as well as between the UK and US within each residence type. Kruskal-Wallis tests were used for rank-sum comparisons between residence types overall and between residence types within each region or country. Significance was set at  $p \leq 0.05$ . All statistical analyses were conducted using Stata, Version 12 (StataCorp. 2011. Stata Statistical Software: Release 12. College Station, TX: StataCorp LP).

## RESULTS:

### Participants:

One thousand, five hundred and eleven (1,511) UK residents and 2,501 US residents responded to the survey. The UK response rate was 24%, and the US response rate was 26%. [16] Eighty-seven percent (86.8%) of UK and 77.0% of US respondents identified as white. Women made up 48.4% of the UK sample and 61.7% of the US respondents. Forty-six percent (45.5%) of UK respondents lived in rural areas or small towns. Only 21.4% of US respondents identified their residence as rural, while over half (51.7%) lived in suburban areas. Demographics are described further in Table 1. Data was missing for five UK respondents on residence type, so these five participants were excluded from the data analysis.

Table 1. Demographic Characteristics, by Region/Country of Residence and Residence Type

| Region/Country of Residence | United Kingdom          |          |       | United States |          |       |
|-----------------------------|-------------------------|----------|-------|---------------|----------|-------|
|                             | n=1511                  |          |       | n=2501        |          |       |
| Residence Type <sup>a</sup> | Rural/<br>Small<br>Town | Suburban | Urban | Rural         | Suburban | Urban |
| Age                         | 688                     | 446      | 372   | 536           | 1294     | 671   |
| 18-29                       | 215                     | 118      | 117   | 32            | 73       | 63    |
| 30-49                       | 235                     | 185      | 162   | 149           | 370      | 209   |
| 50-64                       | 131                     | 93       | 51    | 171           | 431      | 192   |
| 65+                         | 107                     | 50       | 42    | 184           | 420      | 207   |
| Gender                      |                         |          |       |               |          |       |
| Male                        | 358                     | 229      | 188   | 201           | 516      | 240   |
| Female                      | 330                     | 217      | 184   | 335           | 778      | 431   |
| Income Level <sup>b</sup>   |                         |          |       |               |          |       |

|                                                                                              |     |     |     |     |      |     |
|----------------------------------------------------------------------------------------------|-----|-----|-----|-----|------|-----|
| Much below average                                                                           | 26  | 6   | 17  | 106 | 196  | 130 |
| Somewhat below average                                                                       | 109 | 70  | 46  | 112 | 203  | 114 |
| Average                                                                                      | 345 | 234 | 171 | 139 | 262  | 154 |
| Somewhat above average                                                                       | 95  | 111 | 99  | 101 | 339  | 131 |
| Much above average                                                                           | 12  | 6   | 18  | 33  | 165  | 84  |
| Race/Ethnicity                                                                               |     |     |     |     |      |     |
| White, Non-Hispanic                                                                          |     |     |     | 450 | 1031 | 445 |
| Black, Non-Hispanic                                                                          |     |     |     | 33  | 59   | 83  |
| Hispanic                                                                                     |     |     |     | 26  | 96   | 73  |
| White (British, Irish, Other European)                                                       | 610 | 388 | 314 |     |      |     |
| Mixed (White and Black Caribbean, White and Black African, White and Asian, Any Other Mixed) | 54  | 36  | 31  |     |      |     |
| Asian or Asian British                                                                       | 10  | 8   | 14  |     |      |     |
| Black or Black British                                                                       | 8   | 14  | 9   |     |      |     |
| Chinese                                                                                      | 1   | 0   | 3   |     |      |     |
| Other                                                                                        | 2   | 0   | 1   |     |      |     |
| Decline to answer                                                                            | 3   | 0   | 0   |     |      |     |

<sup>a</sup>Missing data from 5 UK respondents on Residence Type

<sup>b</sup>Missing data from 141 UK and 232 US respondents on Income Level

### Outcomes:

A limited sample of respondents from each country (n=471 UK and 1,486 US) answered the question “How confident are you that you can control and manage your health problems?” Over 90% of this limited pool of respondents in both regions answered “very confident” or “confident,” so a statistical comparison was not meaningful, and that question was removed from the final analysis. Results of the other two confidence questions, “How confident are you that if you become seriously ill, you will receive the most effective treatment, including drugs and diagnostic tests?” and “How confident are you that if you become seriously ill, you will be able to afford the care you need?” are described as follows.

#### Confidence in receiving effective treatment:

Overall, the differences between the UK and the US for responses on confidence in receiving effective treatment were significant for both chi-square and Mann-Whitney U tests (Table 2).

Table 2. Survey responses to the question:

How confident are you that if you become seriously ill, you will receive the most effective treatment, including drugs and diagnostic tests?

|                                                 | Confidence Level (%) |           |                    |                      |          |      | Decline to answer | $\chi^2$ | Mann-Whitney U | Kruskal-Wallis |
|-------------------------------------------------|----------------------|-----------|--------------------|----------------------|----------|------|-------------------|----------|----------------|----------------|
|                                                 | Very confident       | Confident | Not very confident | Not at all confident | Not sure |      |                   |          |                |                |
| Comparison between Region/Country <sup>a</sup>  |                      |           |                    |                      |          |      |                   |          |                |                |
| United Kingdom                                  | 32.0%                | 61.3%     | 5.6%               | 0.7%                 | 0.4%     | 0.0% | p<0.001*          | p<0.001* |                |                |
| United States                                   | 34.6%                | 38.7%     | 16.0%              | 9.1%                 | 1.3%     | 0.3% |                   |          |                |                |
| Comparison between Residence Types <sup>b</sup> |                      |           |                    |                      |          |      |                   |          |                |                |
|                                                 |                      |           |                    |                      |          |      | p=0.004*          |          | p=0.004*       |                |

|    |                                                                   |       |       |       |      |      |          |          |
|----|-------------------------------------------------------------------|-------|-------|-------|------|------|----------|----------|
| 1  |                                                                   |       |       |       |      |      |          |          |
| 2  |                                                                   |       |       |       |      |      |          |          |
| 3  | Rural                                                             | 32.0% | 51.2% | 10.2% | 5.2% | 1.2% | 0.1%     |          |
| 4  | Suburban                                                          | 35.9% | 44.9% | 12.4% | 5.6% | 1.0% | 0.2%     |          |
| 5  | Urban                                                             | 31.7% | 46.3% | 13.8% | 7.2% | 0.6% | 0.4%     |          |
| 6  |                                                                   |       |       |       |      |      |          |          |
| 7  | Comparison within Residence Types, by Region/Country <sup>c</sup> |       |       |       |      |      |          |          |
| 8  |                                                                   |       |       |       |      |      |          |          |
| 9  | Rural                                                             |       |       |       |      |      | p<0.001* | p<0.001* |
| 10 | Suburban                                                          |       |       |       |      |      | p<0.001* | p=0.009* |
| 11 | Urban                                                             |       |       |       |      |      | p<0.001* | p<0.001* |
| 12 |                                                                   |       |       |       |      |      |          |          |
| 13 | Comparison within Region/Country, by Residence Types <sup>d</sup> |       |       |       |      |      |          |          |
| 14 |                                                                   |       |       |       |      |      |          |          |
| 15 | United Kingdom                                                    |       |       |       |      |      | p=0.817  | p=0.781  |
| 16 | United States                                                     |       |       |       |      |      | p=0.003* | p=0.001* |

17 <sup>a,c</sup>Chi-square and Mann-Whitney U tests

18 <sup>b,d</sup>Chi-square and Kruskal-Wallis tests

19

20

21

22

23

24

25

26

27

28

29

30

31

32

33

34

35

36

37

38

39

40

41

42

43

44

45

46

47

48

49

50

51

52

53

54

55

56

57

58

59

60

Ninety-three percent (93.3%) of UK residents were confident or very confident in receiving effective treatment, compared with 73.3% of US residents. Within residence types, Mann-Whitney and chi-square tests revealed statistically significant differences between countries (all  $p<0.01$ ). Among residence types overall, differences were also significant based on both chi-square and Kruskal-Wallis tests. Within each country, there were only statistically significant differences by residence type in the US ( $\chi^2 p=0.003$ , Kruskal-Wallis  $p=0.001$ ) and not in the UK ( $\chi^2 p=0.817$ , Kruskal-Wallis  $p=0.781$ ).

#### Confidence in affording care:

Statistically significant differences were found between the UK and US via chi-square and Mann-Whitney tests (Table 3).

Table 3. Survey responses to the question:

How confident are you that if you become seriously ill, you will be able to afford the care you need?

|                                                                   | Confidence Level (%) |           |                    |                      |          |                   | $\chi^2$ | Mann-Whitney U | Kruskal-Wallis |
|-------------------------------------------------------------------|----------------------|-----------|--------------------|----------------------|----------|-------------------|----------|----------------|----------------|
|                                                                   | Very confident       | Confident | Not very confident | Not at all confident | Not sure | Decline to answer |          |                |                |
| Comparison between Region/Country <sup>a</sup>                    |                      |           |                    |                      |          |                   |          |                |                |
| United Kingdom                                                    | 33.8%                | 57.2%     | 6.6%               | 0.6%                 | 1.9%     | 0.0%              | p<0.001* | p<0.001*       |                |
| United States                                                     | 26.6%                | 35.0%     | 22.4%              | 13.6%                | 2.1%     | 0.3%              |          |                |                |
| Comparison between Residence Types <sup>b</sup>                   |                      |           |                    |                      |          |                   |          |                |                |
| Rural                                                             | 27.5%                | 47.7%     | 15.4%              | 6.8%                 | 2.5%     | 0.1%              | p=0.002* |                | p=0.388        |
| Suburban                                                          | 30.7%                | 41.5%     | 17.1%              | 8.7%                 | 1.7%     | 0.3%              |          |                |                |
| Urban                                                             | 29.1%                | 41.4%     | 16.6%              | 11.0%                | 1.8%     | 0.1%              |          |                |                |
| Comparison within Residence Types, by Region/Country <sup>c</sup> |                      |           |                    |                      |          |                   |          |                |                |
| Rural                                                             |                      |           |                    |                      |          |                   | p<0.001* | p<0.001*       |                |
| Suburban                                                          |                      |           |                    |                      |          |                   | p<0.001* | p<0.001*       |                |
| Urban                                                             |                      |           |                    |                      |          |                   | p<0.001* | p<0.001*       |                |
| Comparison within Region/Country, by Residence Types <sup>d</sup> |                      |           |                    |                      |          |                   |          |                |                |
| United Kingdom                                                    |                      |           |                    |                      |          |                   | p=0.339  |                | p=0.084        |

United States

p=0.001\*

p=0.001\*

<sup>a,c</sup>Chi-square and Mann-Whitney U tests<sup>b,d</sup>Chi-square and Kruskal-Wallis tests

In the UK, 91% of respondents were confident or very confident in their ability to afford healthcare, versus 61.6% in the US. Within residence types there were also statistically significant differences. Among residence types overall, there were only statistically significant differences based the chi-square test, not on the Kruskal-Wallis. Within the UK and US, as for the effective treatment question, differences in confidence based on residence type were only statistically significant for US respondents (US:  $\chi^2$  p=0.001, Kruskal-Wallis p=0.001; UK  $\chi^2$  p=0.339, Kruskal-Wallis p=0.084).

A descriptive analysis of responses by residence type in the US revealed that suburban respondents had the highest percentage (76.3%) of confident or very confident ratings in effectiveness of treatment, versus 69.4% in rural areas and 70.4% in urban areas. Regarding ability to afford treatment in the US, 65.4% of suburban residents were confident or very confident, compared with 56.8% in rural areas and 58.2% in urban areas.

## DISCUSSION:

Significant differences were found between the UK and the US in health confidence. Suburban residents in the US expressed higher confidence in both receiving effective treatment and affording care than their rural and urban counterparts; however, overall confidence in the US was significantly lower than in the UK, where residence type did not have an effect. The effect of the overall difference between residence types may be moderated by the lack of difference in the UK. Our findings are supported by a previous study which found that in the UK the public is happier than in the US (and other countries surveyed) regarding their healthcare system and are least likely to be worried about future healthcare needs.[32] Higher confidence in healthcare in the UK than in the US may be related to differences between healthcare systems, to cultural and political differences, or to differing social norms that may influence interpretations in answering questions about confidence. Examining causes for higher or lower respondent confidence could illuminate future directions for health system decision makers in both regions.

In addition to exploring the causes for relative confidence levels in regions, these findings also warrant closer examination of the different confidence levels among residence types within the US. Lower confidence in the rural US may not be simply attributable to health insurance coverage, as rural US coverage is highly variable.[33] Other factors such as income, race/ethnicity, age, and socio-cultural factors may combine to influence rural confidence.[33] The larger percentage of suburban Americans who rated their confidence as high implies that factors in the suburban environment may contribute to a sense of control or reliability. While disparities in access, safety, and quality of care between rural and urban areas are well-documented,[34, 35] our findings suggest that exploring the suburban healthcare environment could provide insight into US healthcare attitudes, especially given that 50% of Americans live in suburban areas.[36] Studies have explored rural, suburban, and urban localities as factors in health information management,[37] minority access to care,[38] and telemedicine satisfaction[39] with varying results for each measure. More targeted research on place of residence in healthcare confidence and quality may be advisable.

1  
2  
3  
4  
5 This analysis contributes to an ongoing discourse about the advantages and disadvantages of UK  
6 and US healthcare systems by calling attention to the role of patient perspectives in this  
7 conversation. How end users perceive their system to be serving them or accessible to them is an  
8 important factor in assessing, maintaining, and revising healthcare legislation, pricing, standards  
9 of care, and communication frameworks. Data on confidence, particularly in patient assessments  
10 of future or hypothetical health circumstances, provide insight into how patients might make  
11 decisions in planning and paying for healthcare. Such data also provide a potential gauge of  
12 public response to policies affecting healthcare. Our findings that UK residents have greater self-  
13 reported confidence in healthcare might suggest higher levels of perceived reliability and system  
14 stability in their single-payer system as well as a perspective of confidence as a social norm. The  
15 outcomes determined here may be viewed not only as markers of patients' personal experiences  
16 with healthcare, but also as indicators of the sociocultural context in which each healthcare  
17 system functions. Comparing responses to confidence questions with responses about insurance  
18 status, accessibility of care, and personal factors such as income and age could be an area for  
19 follow up research that could clarify the extent to which expressions of confidence might be  
20 associated with system features versus other factors.  
21  
22  
23

24  
25 There remain constraints and limitations on our data and subsequent conclusions that must be  
26 taken into consideration. [We were limited by the variables available in a secondary dataset, and](#)  
27 [our use of secondary data was driven by empirical research questions rather than by a conceptual](#)  
28 [framework. This analysis of two countries is exploratory in nature, and further research would be](#)  
29 [needed to determine if our findings hold true in other countries.](#)  
30

31  
32 We acknowledge the inability to assess wholly the concept of confidence. [Bandura refers to](#)  
33 [confidence as nonspecific and a “catchword.”](#)[13] Confidence in one group may not be  
34 generalizable to another for semantic, cultural, and situational reasons. [However, confidence is](#)  
35 [probably a more accessible term than “self-efficacy” or similar concepts for members of the](#)  
36 [public. As such, confidence may serve as a useful proxy in attempts to measure and understand](#)  
37 [patient attitudes and behaviours and has implications distinct from other commonly discussed](#)  
38 [notions such as satisfaction or trust, in that confidence implies components of self-efficacy. One](#)  
39 [study of diabetic patients in the US found a strong correlation between patient self-efficacy and](#)  
40 [confidence in health outcomes, underscoring these separately measured variables as related but](#)  
41 [distinct.](#)[40] For both populations sampled in this study, data was gathered from primarily  
42 English-speaking respondents who answered survey questions about confidence originally  
43 written in English, and both groups received the questions worded identically, providing some  
44 consistency in how confidence might be interpreted here across groups.  
45  
46  
47

48  
49 The issue of confidence itself is somewhat unwieldy given the inherently subjective nature of the  
50 concept and the myriad factors that can contribute to individual confidence. Age, gender,  
51 ethnicity, education, socioeconomic status, health status, and health literacy are just a few of the  
52 many factors that can potentially contribute to confidence in healthcare, and each might also  
53 serve as a potential confounder. Notably, two of the three Commonwealth Fund questions  
54 involve notions of personal forecasting (“if I become seriously ill, then...”), which may be more  
55 subject to biases than questions about conditions that are already present.  
56  
57  
58  
59  
60

1  
2  
3 The definition of “rurality” can be problematic, especially given the disparate categories for the  
4 UK and US. Although the recoding of these categories to combine “village/ rural area” and  
5 “small town” in the UK was rather simple, definitions of what constitutes rural, suburban, and  
6 other descriptors varies culturally and contextually. It is also notable that four healthcare systems  
7 are included in the Commonwealth Fund’s category for the UK. Scotland, Wales, Northern  
8 Ireland, and England each maintain unique healthcare systems, and despite their similarities,  
9 distinctions should be acknowledged when assigning value to UK health system effectiveness  
10 and quality in comparison with the US. For example, while universal registration for primary  
11 care is consistent across the four countries’ health systems, there are key differences in  
12 prescription charges from country to country and in how each country is implementing recent  
13 reforms.[41] In addition to considering these distinct countries in future comparisons, other  
14 healthcare systems such as Canada’s, which combines public funding with private sector  
15 delivery,[42] could provide a useful point of comparison for future analyses of confidence in  
16 healthcare.  
17  
18  
19

### 20 21 **CONCLUSION:**

22 Our analyses revealed significant differences between the UK and the US in self-reported  
23 confidence levels, suggesting a disparity between these regions and their systems in the provision  
24 of equitable healthcare to all residents. Suburban healthcare in the US should be further  
25 examined to identify why it is associated with higher patient confidence levels. The findings of  
26 this study build on existing literature and may provide insight for policy developers and health  
27 practitioners working with rural, suburban, and urban communities. Patient confidence would be  
28 an interesting and culturally relevant measure for future survey projects to explore in more detail.  
29  
30

### 31 **ACKNOWLEDGEMENTS:**

32 The authors wish to thank Cathy Schoen, Michelle Doty, Robin Osborn, David Squires, and  
33 Kristof Stremikis from the Commonwealth Fund for providing the data set and input on the final  
34 draft of this manuscript.  
35  
36

37 **COMPETING INTERESTS:** None to declare.  
38

39 **FUNDING:** None of the authors have an actual or potential financial or commercial conflict of  
40 interest with the information presented in this manuscript.  
41  
42

43 **DATA SHARING:** There is no additional data available.  
44

45 **STATEMENT OF ETHICS:** Ethics approval was not required for this study. [The](#)  
46 [Commonwealth Fund granted permission for secondary analysis of the dataset used.](#)  
47  
48  
49  
50  
51  
52  
53  
54  
55  
56  
57  
58  
59  
60



## REFERENCES

- 1  
2  
3  
4  
5  
6 1 Epstein RM, Street RL Jr. The values and value of patient-centered care. *Ann Fam Med* 2011;**9**(2):100-3.  
7  
8  
9  
10 2 Snyder CF, Aaronson NK, Choucair AK, et al. Implementing patient-reported outcomes  
11 assessment in clinical practice: a review of the options and considerations. *Qual Life Res* 2012;  
12 **21**(8):1305-14.  
13  
14 3 Rathert C, Wyrwich MD, Boren SA. Patient-centered care and outcomes: a systematic review  
15 of the literature. *Med Care Res Rev* Published Online First: 20 November 2012.  
16 doi:10.1177/1077558712465774.  
17  
18  
19 4 Aiken LH, Sermeus W, Van den Heede K, et al. Patient safety, satisfaction, and quality of  
20 hospital care: cross sectional surveys of nurses and patients in 12 countries in Europe and the  
21 United States. *BMJ* 2012;Mar 20(344:e1717) doi:10.1136/bmj.e1717.  
22  
23  
24 5 Campbell SM, Kontopantelis E, Reeves D, et al. Changes in patient experiences of primary  
25 care during health service reforms in England between 2003 and 2007. *Ann Fam Med* 2010;  
26 **8**(6):499-506.  
27  
28  
29 6 Brooks-Carthon JM, Kutney-Lee A, Sloane DM, et al. Quality of care and patient satisfaction  
30 in hospitals with high concentrations of black patients. *J Nurs Scholarsh* 2011; **43**(3):301-310.  
31  
32  
33 7 Employee Benefit Research Institute. Health Confidence Survey: Most Americans Unfamiliar  
34 With Key Aspects of Health Reform. *EBRI Notes* 2011;**32**(9):1-22.  
35  
36  
37 8 Borders TF, Lensing S, Xu KT. Health confidence and racial and ethnic disparities in  
38 consumers' assessments of health care. *Am J Med Qual* 2011;**26**(3):220-8.  
39  
40  
41 9 Robert Wood Johnson Foundation. RWJF Health Care Consumer Confidence Index: July  
42 2009; Accessed January 9, 2013 from <http://www.rwjf.org/healthpolicy/product.jsp?id=47328>.  
43  
44  
45 10 Tataw DB, Bazargan-Hejazi S, James FW. Health services utilization, satisfaction, and  
46 attachment to a regular source of care among participants in an urban health provider alliance. *J*  
47 *Health Hum Serv Adm* 2011;**34**(1):109-41.  
48  
49  
50 11 Frei A, Svarin A, Steurer-Stey C, Puhan MA. Self-efficacy instruments for patients with  
51 chronic diseases suffer from methodological limitations--a systematic review. *Health Qual Life*  
52 *Outcomes* 2009;**7**:86  
53  
54  
55 12 Bandura A, Adams NE, Beyer J. Cognitive processes mediating behavioral change. *J Pers*  
56 *Soc Psychol* 1977;**35**(3):125-39.  
57  
58  
59 13 Bandura A. *Self-efficacy: The exercise of control*. New York: Worth Publishers, 1997.  
60

1  
2  
3 14 Wallston KA. Patient health care behaviours related to medication use and adherence. In:  
4 MacKinnon NJ, ed. *Safe and effective. The eight essential elements of an optimal medication-use*  
5 *system*. Ottawa, ON: Canadian Pharmacists Association, 2007.  
6  
7

8 15 American Medical Association [Internet]. Patient Satisfaction/Experience. Accessed March  
9 12, 2013 from [http://www.ama-assn.org/ama/pub/physician-resources/practice-management-](http://www.ama-assn.org/ama/pub/physician-resources/practice-management-center/practice-operations/patient-satisfaction-experience.page)  
10 [center/practice-operations/patient-satisfaction-experience.page](http://www.ama-assn.org/ama/pub/physician-resources/practice-management-center/practice-operations/patient-satisfaction-experience.page).  
11

12  
13 16 The New York Times [Internet]. Times Topics: Health Care Reform. Accessed March 12,  
14 2013 from  
15 [http://topics.nytimes.com/top/news/health/diseasesconditionsandhealthtopics/health\\_insurance\\_a](http://topics.nytimes.com/top/news/health/diseasesconditionsandhealthtopics/health_insurance_and_managed_care/health_care_reform/index.html)  
16 [nd\\_managed\\_care/health\\_care\\_reform/index.html](http://topics.nytimes.com/top/news/health/diseasesconditionsandhealthtopics/health_insurance_and_managed_care/health_care_reform/index.html).  
17

18  
19 17 The Wall Street Journal [Internet]. Topics: Health Reform. Accessed March 12, 2013 from  
20 <http://topics.wsj.com/subject/H/health-reform/1662>.  
21

22  
23 18 Rosenstock IM. Why people use health services. *Milbank Mem Fund Q* 1966;**44**(3):94-127.  
24

25 19 Soroka S, Maioni A, Martin P. What moves public opinion on health care? Individual  
26 experiences, system performance, and media framing. *J Health Polit Polic Law*. Forthcoming  
27 2013. Accessed March 12, 2013 from  
28 [http://www.snsoroka.com/files/WhatMovesPO\\_JHPPL.pdf](http://www.snsoroka.com/files/WhatMovesPO_JHPPL.pdf).  
29

30  
31 20 Franco OH, Wong YL, Kandala NB, et al. Cross-cultural comparison of correlates of quality  
32 of life and health status: the Whitehall II Study (UK) and the Western New York Health Study  
33 (US). *Eur J Epidemiol* 2012;**27**(4):255-65.  
34

35  
36 21 Light D. Universal health care: Lessons from the British experience. *Am J Public Health*  
37 2003;**93**(1):25-30.  
38

39  
40 22 Banks J, Marmot M, Oldfield Z, Smith JP. Disease and disadvantage in the United States and  
41 in England. *JAMA* 2006;**295**(17):2037-45.  
42

43  
44 23 Coulter A, Jenkinson C. European patients' views on the responsiveness of health systems and  
45 healthcare providers. *Eur J Public Health* 2005;**15**(4):355-60.  
46

47  
48 24 Rohrer JE, Borders TF. Healthy skepticism. *Adv Prev Med* 2004;**39**(6):1234-7.  
49

50  
51 25 Calnan MW, Sanford E. Public trust in health care: the system or the doctor? *Qual Saf Health*  
52 *Care* 2004;**13**(2):92-7.  
53

54  
55 26 Hesse BW, Nelson DE, Kreps GL, et al. Trust and sources of health information: the impact  
56 of the Internet and its implications for health care providers: findings from the first Health  
57 Information National Trends Survey. *Arch Intern Med* 2005;**165**(22):2618.  
58  
59  
60

- 1  
2  
3 27 Rockers PC, Kruk ME, Laugesen MJ. Perceptions of the health system and public trust in  
4 government in low-and middle-income countries: evidence from the World Health Surveys. *J*  
5 *Health Polit Policy Law* 2012;**37**(3):405-37.  
6  
7  
8 28 Delamater AM. Improving patient adherence. *Clin Diabetes* 2006;**24**(2):71-7.  
9  
10 29 Girotra S, Cram P, Popescu I. Patient satisfaction at America's lowest performing hospitals.  
11 *Circ Cardiovasc Qual Outcomes* 2012;**5**(3):365-72.  
12  
13  
14 30 Levinton C, Veillard J, Slutsky A, Brown A. The importance of place of residence in patient  
15 satisfaction. *Int J Qual Health Care* 2011;**23**(5):495-502.  
16  
17  
18 31 Schoen C, Osborn R, Squires D, et al. How health insurance design affects access to care and  
19 costs, by income, in eleven countries. *Health Aff* 2010;**29**(12):2323-34.  
20  
21 32 Donelan K, Blendon RJ, Schoen C, et al. The cost of health system change: public discontent  
22 in five nations. *Health Aff* 1999;**18**(3):206-16.  
23  
24  
25 33 Kaiser Family Foundation [Internet]. Kaiser Commission on Medicaid and the Uninsured.  
26 Health Insurance Coverage in Rural America. 2003. Accessed March 12, 2013 from  
27 <http://www.kff.org/uninsured/upload/Health-Insurance-Coverage-in-Rural-America-PDF.pdf>.  
28  
29  
30 34 Ryan K, Rahman A. Examining factors influencing patient satisfaction with nurse  
31 practitioners in rural urgent care centers. *J Am Acad Nurse Pract* 2012;**24**(2):77-81.  
32  
33 35 Bennett K, Olatosi B, Probst J. Health Disparities: A Rural-Urban Chartbook. Carolina Rural  
34 Health Research Center, 2008; Accessed January 9, 2013 from  
35 [http://rhr.sph.sc.edu/report\\_by\\_topic.html#1-09](http://rhr.sph.sc.edu/report_by_topic.html#1-09).  
36  
37  
38 36 Hobbs F, Stoops N. Demographic Trends in the 20th Century: Census 2000 Special Reports.  
39 US Census Bureau, 2002; Accessed January 9, 2013 from  
40 <http://www.census.gov/prod/2002pubs/censr-4.pdf>.  
41  
42  
43 37 Lorence D, Chen L. Disparities in health information quality across the rural-urban  
44 continuum: where is coded data more reliable? *J Med Syst* 2008;**32**(1):1-8.  
45  
46 38 Berdahl TA, Kirby JB, Stone RA. Access to health care for nonmetro and metro Latinos of  
47 Mexican origin in the United States. *Med Care* 2007;**45**(7):647-54.  
48  
49  
50 39 Hilty DM, Nesbitt TS, Kuenneth CA, Cruz GM, Hales RE. Rural versus suburban primary  
51 care needs, utilization, and satisfaction with telepsychiatric consultation. *J Rural Health*  
52 2007;**23**(2):163-5.  
53  
54 40 Skelly AH, Marshall JR, Haughey BP, et al. Self-efficacy and confidence in outcomes as  
55 determinants of self-care practices in inner-city, African-American women with non-insulin-  
56 dependent diabetes. *Diabetes Educ* 1995;**21**(1):38-46.  
57  
58  
59  
60

1  
2  
3  
4  
5 41 Roland M, Guthrie B, Thomé DC. Primary medical care in the United Kingdom. *J Am Board*  
6 *Fam Med* 2012;**25**(S1):S6-11.  
7

8 42 Shi L, Singh D. Major Characteristics of U.S. Health Care Delivery. In: *Essentials of the U.S.*  
9 *Health Care System*. Sudbury, MA: Jones and Bartlett Publishers; 2010. p. 1-25.  
10  
11  
12  
13  
14  
15  
16  
17  
18  
19  
20  
21  
22  
23  
24  
25  
26  
27  
28  
29  
30  
31  
32  
33  
34  
35  
36  
37  
38  
39  
40  
41  
42  
43  
44  
45  
46  
47  
48  
49  
50  
51  
52  
53  
54  
55  
56  
57  
58  
59  
60
